# Supplementary material for: An Efficient Synthesis, Spectroscopic Characterization, and Optical Nonlinearity Response of Novel Salicylaldehyde Thiosemicarbazone Derivatives
Source: PubMed Central journal article supplement — ACS Omega. 2021 Jun 11;6(24):16058–65. doi: 10.1021/acsomega.1c01938 (PMC8223424; doi:10.1021/acsomega.1c01938), 2021-06-11
Supplement: ao1c01938_si_001.pdf [file ao1c01938_si_001.pdf]

## Supplementary Information

### An efficient synthesis, Spectroscopic Characterization and Optical Nonlinearity Response of Novel Salicylaldehyde Thiosemicarbazone Derivatives

Muhammad Khalid,\*<sup>§1</sup>, Rifat Jawaria\*<sup>§1</sup>, Muhammad Usman Khan,<sup>2</sup> Ataulpa Albert Carmo Braga<sup>3</sup>, Zahid Shafiq,<sup>4</sup> Muhammad Imran<sup>5</sup>, Hafiz Muhammad Ahmad Zafar<sup>1</sup>, Ahmad Irfan<sup>5</sup>

<sup>1</sup>Department of Chemistry, Khwaja Fareed University of Engineering & Information Technology, Rahim Yar Khan 64200, Pakistan.

<sup>2</sup>Department of Chemistry, University of Okara, Okara-56300, Pakistan

<sup>3</sup> Departamento de Química Fundamental, Instituto de Química, Universidade de São Paulo, Av. Prof. Lineu Prestes, 748, São Paulo, 05508-000, Brazil.

<sup>4</sup> Institute of Chemical Sciences, Bahauddin Zakariya University, 60800-Multan, Pakistan.

<sup>5</sup> Department of Chemistry, Faculty of Science, King Khalid University, P.O. Box 9004, Abha 61413, Saudi Arabia.

<sup>§</sup>Both authors contributed equally to this work.

\* Corresponding author E-mail address:

Dr. Muhammad Khalid: [khalid@iq.usp.br](mailto:khalid@iq.usp.br); [muhammad.khalid@kfueit.edu.pk](mailto:muhammad.khalid@kfueit.edu.pk)

**Table S1:** Natural bond orbital (NBO) analysis of investigated compound (1).

| Donor (i) | Type       | Acceptor (j) | Type         | E(2) <sup>a</sup><br>[kcal/mol] | E(j)-E(i) <sup>b</sup><br>[a.u.] | F(i,j) <sup>c</sup><br>[a.u.] |
|-----------|------------|--------------|--------------|---------------------------------|----------------------------------|-------------------------------|
| C25-C27   | $\pi$      | C28-C30      | $\pi^*$      | 26.69                           | 0.3                              | 0.08                          |
| C28-C30   | $\pi$      | C24-C26      | $\pi^*$      | 24.23                           | 0.31                             | 0.078                         |
| C24-C26   | $\pi$      | C25-C27      | $\pi^*$      | 23.79                           | 0.29                             | 0.076                         |
| C4-C5     | $\pi$      | C2-C3        | $\pi^*$      | 22.85                           | 0.30                             | 0.074                         |
| C4-C5     | $\pi$      | C1-C6        | $\pi^*$      | 21.61                           | 0.30                             | 0.072                         |
| C24-C26   | $\pi$      | C28-C30      | $\pi^*$      | 19.35                           | 0.29                             | 0.068                         |
| C25-C27   | $\pi$      | C24-C26      | $\pi^*$      | 18.55                           | 0.31                             | 0.068                         |
| C24-C26   | $\pi$      | N21-C22      | $\pi^*$      | 10.28                           | 0.32                             | 0.053                         |
| N21-C22   | $\pi$      | C24-C26      | $\pi^*$      | 4.87                            | 0.37                             | 0.041                         |
| C22-H23   | $\partial$ | N19-N21      | $\partial^*$ | 9.06                            | 0.92                             | 0.082                         |
| C4-C5     | $\partial$ | C3-C4        | $\partial^*$ | 4.27                            | 1.30                             | 0.067                         |
| C6-H11    | $\partial$ | C1-C2        | $\partial^*$ | 3.97                            | 1.11                             | 0.059                         |
| C25-C27   | $\partial$ | C22-C24      | $\partial^*$ | 2.98                            | 1.21                             | 0.054                         |
| C1-C6     | $\partial$ | C5-H10       | $\partial^*$ | 2.51                            | 1.13                             | 0.048                         |
| C12-H13   | $\partial$ | C2-C3        | $\partial^*$ | 1.97                            | 1.10                             | 0.042                         |
| C2-H8     | $\partial$ | C2-C3        | $\partial^*$ | 1.01                            | 1.12                             | 0.03                          |
| N15-H16   | $\partial$ | C17-N19      | $\partial^*$ | 0.99                            | 1.09                             | 0.03                          |

|         |          |         |            |       |      |       |
|---------|----------|---------|------------|-------|------|-------|
| C17-N19 | $\delta$ | N19-H20 | $\delta^*$ | 0.52  | 1.21 | 0.023 |
| C12-H14 | $\delta$ | C3-C12  | $\delta^*$ | 0.51  | 0.95 | 0.02  |
| N15     | LP(1)    | C17-S18 | $\delta^*$ | 49.93 | 0.30 | 0.112 |
| N19     | LP(1)    | C17-S18 | $\delta^*$ | 34.05 | 0.31 | 0.093 |
| O33     | LP(2)    | C25-C27 | $\pi^*$    | 31.89 | 0.37 | 0.103 |
| S18     | LP(2)    | C17-N19 | $\delta^*$ | 15.37 | 0.60 | 0.087 |
| Br35    | LP(3)    | C28-C30 | $\pi^*$    | 10.01 | 0.32 | 0.055 |
| N21     | LP(1)    | N19-H20 | $\delta^*$ | 9.41  | 0.74 | 0.075 |
| N15     | LP(1)    | C12-H14 | $\delta^*$ | 7.71  | 0.66 | 0.068 |
| O33     | LP(1)    | C25-C27 | $\delta^*$ | 6.38  | 1.20 | 0.078 |
| N15     | LP(1)    | C12-H13 | $\delta^*$ | 3.08  | 0.66 | 0.043 |
| N15     | LP(1)    | C17-S18 | $\pi^*$    | 1.21  | 0.53 | 0.024 |
| N15     | LP(1)    | C3-C12  | $\delta^*$ | 0.52  | 0.73 | 0.019 |

**Table S2:** Natural bond orbital (NBO) analysis of investigated compound (**2**).

| Donor<br>(i) | Type     | Acceptor<br>(j) | Type       | E(2) <sup>a</sup><br>[kcal/mol] | E(j)-E(i) <sup>b</sup><br>[a.u.] | F(i,j) <sup>c</sup><br>[a.u.] |
|--------------|----------|-----------------|------------|---------------------------------|----------------------------------|-------------------------------|
| C24-C26      | $\pi$    | C27-C29         | $\pi^*$    | 26.68                           | 0.3                              | 0.08                          |
| C3-C4        | $\pi$    | C1-C2           | $\pi^*$    | 25.66                           | 0.29                             | 0.078                         |
| C27-C29      | $\pi$    | C23-C25         | $\pi^*$    | 24.17                           | 0.31                             | 0.078                         |
| C5-C6        | $\pi$    | C3-C4           | $\pi^*$    | 24.02                           | 0.3                              | 0.076                         |
| C23-C25      | $\pi$    | C24-C26         | $\pi^*$    | 23.73                           | 0.29                             | 0.076                         |
| C1-C2        | $\pi$    | C5-C6           | $\pi^*$    | 22.52                           | 0.32                             | 0.075                         |
| C5-C6        | $\pi$    | C1-C2           | $\pi^*$    | 21.36                           | 0.29                             | 0.07                          |
| C1-C2        | $\pi$    | C3-C4           | $\pi^*$    | 20.93                           | 0.32                             | 0.073                         |
| C3-C4        | $\pi$    | C5-C6           | $\pi^*$    | 20.64                           | 0.3                              | 0.07                          |
| C23-C25      | $\pi$    | C27-C29         | $\pi^*$    | 19.36                           | 0.29                             | 0.068                         |
| C24-C26      | $\pi$    | C23-C25         | $\pi^*$    | 18.54                           | 0.31                             | 0.068                         |
| C27-C29      | $\pi$    | C24-C26         | $\pi^*$    | 17.19                           | 0.3                              | 0.066                         |
| C23-C25      | $\pi$    | N20-C21         | $\pi^*$    | 10.37                           | 0.32                             | 0.053                         |
| N20-C21      | $\pi$    | C23-C25         | $\pi^*$    | 4.97                            | 0.37                             | 0.042                         |
| N20-C21      | $\pi$    | N20-C21         | $\pi^*$    | 1.09                            | 0.39                             | 0.019                         |
| C24-C26      | $\pi$    | C24-C26         | $\pi^*$    | 0.54                            | 0.3                              | 0.011                         |
| C21-H22      | $\sigma$ | N18-N20         | $\sigma^*$ | 9.10                            | 0.92                             | 0.082                         |
| C16-S17      | $\sigma$ | C16-S17         | $\sigma^*$ | 7.91                            | 0.37                             | 0.053                         |
| C1-C2        | $\sigma$ | C2-C3           | $\sigma^*$ | 5.73                            | 1.31                             | 0.078                         |
| C23-C25      | $\sigma$ | C27-Br34        | $\sigma^*$ | 5.15                            | 0.83                             | 0.058                         |
| C23-C25      | $\sigma$ | C25-C27         | $\sigma^*$ | 5.02                            | 1.3                              | 0.072                         |
| C23-C24      | $\sigma$ | C24-C26         | $\sigma^*$ | 4.77                            | 1.28                             | 0.07                          |
| C3-C4        | $\sigma$ | C2-F35          | $\sigma^*$ | 4.12                            | 1                                | 0.057                         |
| C5-H9        | $\sigma$ | C1-C6           | $\sigma^*$ | 3.98                            | 1.11                             | 0.059                         |
| C27-Br34     | $\sigma$ | C23-C25         | $\sigma^*$ | 3.51                            | 1.23                             | 0.059                         |
| C27-Br34     | $\sigma$ | C26-C29         | $\sigma^*$ | 3.15                            | 1.24                             | 0.056                         |

|          |          |         |            |       |      |       |
|----------|----------|---------|------------|-------|------|-------|
| C21-C23  | $\sigma$ | C24-C26 | $\sigma^*$ | 3.01  | 1.24 | 0.054 |
| C24-C26  | $\sigma$ | C21-C23 | $\sigma^*$ | 2.97  | 1.21 | 0.054 |
| C11-N14  | $\sigma$ | N14-C16 | $\sigma^*$ | 1.84  | 1.22 | 0.043 |
| C4-C5    | $\sigma$ | C5-H9   | $\sigma^*$ | 1.27  | 1.13 | 0.034 |
| C26-H30  | $\sigma$ | C26-C29 | $\sigma^*$ | 1.02  | 1.12 | 0.03  |
| C6-H10   | $\sigma$ | C5-C6   | $\sigma^*$ | 0.75  | 1.11 | 0.026 |
| C11-H12  | $\sigma$ | C3-C11  | $\sigma^*$ | 0.66  | 0.94 | 0.022 |
| C27-Br34 | $\sigma$ | C25-H28 | $\sigma^*$ | 0.58  | 1.07 | 0.022 |
| C16-S17  | $\sigma$ | N14-C16 | $\sigma^*$ | 0.57  | 0.81 | 0.019 |
| C16-N18  | $\sigma$ | N18-H19 | $\sigma^*$ | 0.53  | 1.21 | 0.023 |
| C2-F35   | $\sigma$ | C1-C2   | $\sigma^*$ | 0.51  | 1.64 | 0.026 |
| N14-H15  | $\sigma$ | C16-S17 | $\pi^*$    | 5.24  | 0.91 | 0.063 |
| C16-S17  | $\sigma$ | C16-S17 | $\pi^*$    | 4.16  | 0.6  | 0.046 |
| N18-H19  | $\sigma$ | C16-S17 | $\pi^*$    | 3.85  | 0.94 | 0.055 |
| C11-H13  | $\sigma$ | C3-C4   | $\pi^*$    | 2.44  | 0.54 | 0.035 |
| C21-H22  | $\sigma$ | C23-C25 | $\pi^*$    | 1.76  | 0.53 | 0.03  |
| C11-N14  | $\sigma$ | C3-C4   | $\pi^*$    | 1.57  | 0.79 | 0.034 |
| C23-C25  | $\sigma$ | N20-C21 | $\pi^*$    | 0.63  | 0.76 | 0.02  |
| N14      | LP(1)    | C16-S17 | $\pi^*$    | 31.93 | 0.53 | 0.024 |
| N18      | LP(1)    | C16-S17 | $\pi^*$    | 31.14 | 0.54 | 0.047 |
| N18      | LP(1)    | N20-C21 | $\pi^*$    | 19.14 | 0.33 | 0.093 |
| O32      | LP(2)    | C24-C26 | $\pi^*$    | 10.03 | 0.37 | 0.103 |
| Br34     | LP(3)    | C27-C29 | $\pi^*$    | 4.64  | 0.32 | 0.055 |
| F35      | LP(3)    | C1-C2   | $\pi^*$    | 1.22  | 0.46 | 0.091 |
| N14      | LP(1)    | C16-S17 | $\sigma^*$ | 48.81 | 0.3  | 0.111 |
| N18      | LP(1)    | C16-S17 | $\sigma^*$ | 34.31 | 0.31 | 0.093 |
| S17      | LP(2)    | C16-N18 | $\sigma^*$ | 15.38 | 0.61 | 0.088 |
| N20      | LP(1)    | N18-H19 | $\sigma^*$ | 9.49  | 0.74 | 0.076 |
| F35      | LP(2)    | C2-C3   | $\sigma^*$ | 5.94  | 1.01 | 0.069 |
| Br34     | LP(2)    | C27-C29 | $\sigma^*$ | 3.59  | 0.88 | 0.05  |
| F35      | LP(1)    | C1-C2   | $\sigma^*$ | 1.13  | 1.64 | 0.039 |
| S17      | LP(2)    | C3-C11  | $\sigma^*$ | 0.97  | 0.62 | 0.023 |
| S17      | LP(1)    | C16-S17 | $\sigma^*$ | 0.88  | 0.71 | 0.025 |

**Table S3:** Natural bond orbital (NBO) analysis of investigated compound (**3**).

| Donor<br>(i) | Type  | Acceptor<br>(j) | Type    | E(2) <sup>a</sup><br>[kcal/mol] | E(j)-E(i) <sup>b</sup><br>[a.u.] | F(i,j) <sup>c</sup><br>[a.u.] |
|--------------|-------|-----------------|---------|---------------------------------|----------------------------------|-------------------------------|
| C1-C6        | $\pi$ | C4-C5           | $\pi^*$ | 25.42                           | 0.29                             | 0.078                         |
| C2-C3        | $\pi$ | C1-C6           | $\pi^*$ | 24.46                           | 0.3                              | 0.076                         |
| C4-C5        | $\pi$ | C2-C3           | $\pi^*$ | 23.92                           | 0.32                             | 0.078                         |
| C2-C3        | $\pi$ | C4-C5           | $\pi^*$ | 19.94                           | 0.29                             | 0.068                         |
| C4-C5        | $\pi$ | C1-C6           | $\pi^*$ | 19.73                           | 0.31                             | 0.07                          |
| C1-C6        | $\pi$ | C2-C3           | $\pi^*$ | 19.35                           | 0.3                              | 0.069                         |

|         |          |          |            |       |      |       |
|---------|----------|----------|------------|-------|------|-------|
| C23-C25 | $\pi$    | N20-C21  | $\pi^*$    | 9.87  | 0.32 | 0.052 |
| N20-C21 | $\pi$    | C23-C25  | $\pi^*$    | 4.71  | 0.37 | 0.041 |
| N20-C21 | $\pi$    | N20-C21  | $\pi^*$    | 1.07  | 0.39 | 0.019 |
| C16-S17 | $\pi$    | C16-S17  | $\pi^*$    | 0.86  | 0.88 | 0.025 |
| C4-C5   | $\pi$    | C4-C5    | $\pi^*$    | 0.51  | 0.3  | 0.011 |
| C21-H22 | $\sigma$ | N18-N20  | $\sigma^*$ | 9.06  | 0.92 | 0.082 |
| C16-S17 | $\sigma$ | C16-S17  | $\sigma^*$ | 7.89  | 0.38 | 0.054 |
| C26-C29 | $\sigma$ | C27-Br34 | $\sigma^*$ | 5.45  | 0.84 | 0.06  |
| C23-C25 | $\sigma$ | C25-C27  | $\sigma^*$ | 5.01  | 1.3  | 0.072 |
| C2-H8   | $\sigma$ | C3-C4    | $\sigma^*$ | 4.92  | 1.1  | 0.066 |
| C23-C25 | $\sigma$ | C23-C24  | $\sigma^*$ | 4.24  | 1.27 | 0.066 |
| C6-H10  | $\sigma$ | C4-C5    | $\sigma^*$ | 4.06  | 1.11 | 0.06  |
| C2-H8   | $\sigma$ | C1-C6    | $\sigma^*$ | 3.85  | 1.11 | 0.058 |
| C6-H10  | $\sigma$ | C1-C2    | $\sigma^*$ | 3.79  | 1.12 | 0.058 |
| N14-C16 | $\sigma$ | N18-N20  | $\sigma^*$ | 3.29  | 1.26 | 0.058 |
| C23-C24 | $\sigma$ | C21-C23  | $\sigma^*$ | 2.82  | 1.19 | 0.052 |
| C3-C11  | $\sigma$ | C3-C4    | $\sigma^*$ | 2.52  | 1.23 | 0.05  |
| C25-C27 | $\sigma$ | C25-H28  | $\sigma^*$ | 1.85  | 1.15 | 0.041 |
| C23-C24 | $\sigma$ | O32-H33  | $\sigma^*$ | 1.62  | 1.12 | 0.038 |
| C5-C6   | $\sigma$ | C6-H10   | $\sigma^*$ | 1.25  | 1.14 | 0.034 |
| C23-C25 | $\sigma$ | C25-H28  | $\sigma^*$ | 1.14  | 1.12 | 0.032 |
| C26-H30 | $\sigma$ | C26-C29  | $\sigma^*$ | 1.02  | 1.12 | 0.03  |
| C11-N14 | $\sigma$ | C3-C11   | $\sigma^*$ | 0.71  | 1.2  | 0.026 |
| C2-C3   | $\sigma$ | C11-N14  | $\sigma^*$ | 0.56  | 1.07 | 0.022 |
| C5-F35  | $\sigma$ | C4-C5    | $\sigma^*$ | 0.55  | 1.65 | 0.027 |
| C16-N18 | $\sigma$ | N18-H19  | $\sigma^*$ | 0.54  | 1.21 | 0.023 |
| N14-H15 | $\sigma$ | C16-S17  | $\pi^*$    | 5.15  | 0.91 | 0.062 |
| C16-S17 | $\sigma$ | C16-S17  | $\pi^*$    | 4.23  | 0.6  | 0.046 |
| C11-H12 | $\sigma$ | C2-C3    | $\pi^*$    | 4.18  | 0.54 | 0.046 |
| N18-H19 | $\sigma$ | C16-S17  | $\pi^*$    | 3.81  | 0.93 | 0.055 |
| C21-H22 | $\sigma$ | C23-C25  | $\pi^*$    | 1.8   | 0.54 | 0.03  |
| C11-N14 | $\sigma$ | C2-C3    | $\pi^*$    | 1.15  | 0.8  | 0.03  |
| C23-C25 | $\sigma$ | N20-C21  | $\pi^*$    | 0.66  | 0.76 | 0.021 |
| N14     | LP(1)    | C16-S17  | $\sigma^*$ | 46.77 | 0.31 | 0.11  |
| N18     | LP(1)    | C16-S17  | $\sigma^*$ | 33.68 | 0.31 | 0.093 |
| S17     | LP(2)    | C16-N18  | $\sigma^*$ | 15.35 | 0.61 | 0.088 |
| N20     | LP(1)    | C21-C23  | $\sigma^*$ | 12.26 | 0.85 | 0.092 |
| N20     | LP(1)    | N18-H19  | $\sigma^*$ | 9.47  | 0.74 | 0.076 |
| N14     | LP(1)    | C11-H13  | $\sigma^*$ | 7.91  | 0.66 | 0.069 |
| N20     | LP(1)    | C21-H22  | $\sigma^*$ | 5.48  | 0.78 | 0.059 |
| Br34    | LP(2)    | C27-C29  | $\sigma^*$ | 3.65  | 0.88 | 0.051 |
| N14     | LP(1)    | C11-H12  | $\sigma^*$ | 2.61  | 0.67 | 0.04  |
| Br34    | LP(1)    | C25-C27  | $\sigma^*$ | 1.66  | 1.58 | 0.046 |

|     |        |         |            |       |      |       |
|-----|--------|---------|------------|-------|------|-------|
| S17 | LP(1)  | C16-S17 | $\sigma^*$ | 0.9   | 0.71 | 0.025 |
| S17 | LP(2)  | C3-C11  | $\sigma^*$ | 0.9   | 0.62 | 0.022 |
| N14 | LP(1)  | C3-C11  | $\sigma^*$ | 0.71  | 0.73 | 0.022 |
| C27 | LP(1)  | C23-C25 | $\pi^*$    | 70.69 | 0.17 | 0.115 |
| C27 | LP(1)  | C26-C29 | $\pi^*$    | 70.66 | 0.17 | 0.115 |
| C24 | LP*(1) | C26-C29 | $\pi^*$    | 64.49 | 0.15 | 0.109 |
| C24 | LP*(1) | C23-C25 | $\pi^*$    | 63.55 | 0.15 | 0.108 |
| N18 | LP(1)  | N20-C21 | $\pi^*$    | 30.79 | 0.33 | 0.093 |
| F35 | LP(3)  | C4-C5   | $\pi^*$    | 20.41 | 0.46 | 0.093 |
| N14 | LP(1)  | C16-S17 | $\pi^*$    | 1.38  | 0.53 | 0.025 |

**Table S4:** Natural bond orbital (NBO) analysis of investigated compound (4).

| Donor<br>(i) | Type       | Acceptor<br>(j) | Type         | E(2) <sup>a</sup><br>[kcal/mol] | E(j)-E(i) <sup>b</sup><br>[a.u.] | F(i,j) <sup>c</sup><br>[a.u.] |
|--------------|------------|-----------------|--------------|---------------------------------|----------------------------------|-------------------------------|
| C23-C25      | $\pi$      | C26-C28         | $\pi^*$      | 26.75                           | 0.30                             | 0.081                         |
| C1-C6        | $\pi$      | C2-C3           | $\pi^*$      | 22.84                           | 0.32                             | 0.076                         |
| C2-C3        | $\pi$      | C1-C6           | $\pi^*$      | 20.56                           | 0.29                             | 0.07                          |
| C22-C24      | $\pi$      | C26-C28         | $\pi^*$      | 19.28                           | 0.29                             | 0.068                         |
| C23-C25      | $\pi$      | C22-C24         | $\pi^*$      | 18.68                           | 0.31                             | 0.068                         |
| C26-C28      | $\pi$      | C23-C25         | $\pi^*$      | 17.21                           | 0.30                             | 0.066                         |
| N19-C20      | $\pi$      | C22-C24         | $\pi^*$      | 4.58                            | 0.37                             | 0.04                          |
| N19-C20      | $\pi$      | N19-C20         | $\pi^*$      | 1.09                            | 0.39                             | 0.019                         |
| C20-H21      | $\partial$ | N17-N19         | $\partial^*$ | 9.03                            | 0.92                             | 0.082                         |
| C5-H35       | $\partial$ | C3-C4           | $\partial^*$ | 3.99                            | 1.11                             | 0.06                          |
| C23-C25      | $\partial$ | C20-C22         | $\partial^*$ | 3.01                            | 1.21                             | 0.054                         |
| C20-C22      | $\partial$ | C24-C26         | $\partial^*$ | 2.97                            | 1.25                             | 0.054                         |
| C1-C6        | $\partial$ | C1-H7           | $\partial^*$ | 1.28                            | 1.14                             | 0.034                         |
| C25-H29      | $\partial$ | C25-C28         | $\partial^*$ | 1.02                            | 1.12                             | 0.03                          |
| N13-H14      | $\partial$ | C15-N17         | $\partial^*$ | 0.99                            | 1.09                             | 0.03                          |
| C6-F34       | $\partial$ | C1-C6           | $\partial^*$ | 0.52                            | 1.65                             | 0.026                         |
| C6-F34       | $\partial$ | C5-C6           | $\partial^*$ | 0.50                            | 1.64                             | 0.026                         |
| N13          | LP(1)      | C15-S16         | $\partial^*$ | 50.52                           | 0.29                             | 0.112                         |
| N17          | LP(1)      | N19-C20         | $\pi^*$      | 30.92                           | 0.33                             | 0.093                         |
| F34          | LP(3)      | C1-C6           | $\pi^*$      | 20.26                           | 0.46                             | 0.093                         |
| S16          | LP(2)      | C15-N17         | $\partial^*$ | 15.34                           | 0.61                             | 0.088                         |
| N19          | LP(1)      | N17-H18         | $\partial^*$ | 9.48                            | 0.74                             | 0.076                         |
| N19          | LP(1)      | C20-H21         | $\partial^*$ | 5.48                            | 0.78                             | 0.059                         |
| N17          | LP(1)      | C15-S16         | $\pi^*$      | 4.14                            | 0.55                             | 0.045                         |
| Br33         | LP(2)      | C26-C28         | $\partial^*$ | 3.63                            | 0.88                             | 0.05                          |
| N13          | LP(1)      | C15-S16         | $\pi^*$      | 1.04                            | 0.54                             | 0.022                         |
| S16          | LP(1)      | C15-S16         | $\partial^*$ | 0.84                            | 0.7                              | 0.024                         |
| N13          | LP(1)      | C3-C10          | $\partial^*$ | 0.66                            | 0.73                             | 0.021                         |

**Table S5:** Natural bond orbital (NBO) analysis of compound (5).

| Donor<br>(i) | Type       | Acceptor<br>(j) | Type         | E(2) <sup>a</sup><br>[kcal/mol] | E(j)-E(i) <sup>b</sup><br>[a.u.] | F(i,j) <sup>c</sup><br>[a.u.] |
|--------------|------------|-----------------|--------------|---------------------------------|----------------------------------|-------------------------------|
| C22-C24      | $\pi$      | C22-C24         | $\pi^*$      | 0.54                            | 0.3                              | 0.011                         |
| N18-C19      | $\pi$      | N18-C19         | $\pi^*$      | 1.01                            | 0.39                             | 0.018                         |
| N18-C19      | $\pi$      | C21-C23         | $\pi^*$      | 4.73                            | 0.37                             | 0.041                         |
| C21-C23      | $\pi$      | N18-C19         | $\pi^*$      | 10.05                           | 0.32                             | 0.053                         |
| C21-C23      | $\pi$      | N18-C19         | $\pi^*$      | 54.54                           | 0.02                             | 0.056                         |
| C25-C27      | $\pi$      | C22-C24         | $\pi^*$      | 17.25                           | 0.3                              | 0.066                         |
| C21-C23      | $\pi$      | C25-C27         | $\pi^*$      | 19.32                           | 0.29                             | 0.068                         |
| C22-C24      | $\pi$      | C21-C23         | $\pi^*$      | 18.67                           | 0.31                             | 0.068                         |
| C3-C4        | $\pi$      | C5-C6           | $\pi^*$      | 21.54                           | 0.29                             | 0.072                         |
| C5-C6        | $\pi$      | C1-C2           | $\pi^*$      | 22.06                           | 0.3                              | 0.072                         |
| C1-C2        | $\pi$      | C3-C4           | $\pi^*$      | 21.83                           | 0.3                              | 0.073                         |
| C1-C2        | $\pi$      | C5-C6           | $\pi^*$      | 22.83                           | 0.3                              | 0.074                         |
| C3-C4        | $\pi$      | C1-C2           | $\pi^*$      | 23.85                           | 0.29                             | 0.075                         |
| C5-C6        | $\pi$      | C3-C4           | $\pi^*$      | 23.5                            | 0.3                              | 0.076                         |
| C21-C23      | $\pi$      | C22-C24         | $\pi^*$      | 23.91                           | 0.29                             | 0.076                         |
| C25-C27      | $\pi$      | C21-C23         | $\pi^*$      | 24.49                           | 0.31                             | 0.079                         |
| C22-C24      | $\pi$      | C25-C27         | $\pi^*$      | 26.78                           | 0.3                              | 0.081                         |
| C34-H37      | $\partial$ | C4-C34          | $\partial^*$ | 0.52                            | 0.95                             | 0.02                          |
| C3-C9        | $\partial$ | C9-N12          | $\partial^*$ | 0.63                            | 1                                | 0.022                         |
| C19-C21      | $\partial$ | C19-H20         | $\partial^*$ | 0.58                            | 1.08                             | 0.022                         |
| C25-Br32     | $\partial$ | C23-H26         | $\partial^*$ | 0.55                            | 1.07                             | 0.022                         |
| C25-Br32     | $\partial$ | C27-H29         | $\partial^*$ | 0.58                            | 1.07                             | 0.022                         |
| C3-C9        | $\partial$ | C9-H11          | $\partial^*$ | 0.67                            | 1.02                             | 0.023                         |
| C4-C5        | $\partial$ | C34-H35         | $\partial^*$ | 0.59                            | 1.1                              | 0.023                         |
| C4-C34       | $\partial$ | C34-H35         | $\partial^*$ | 0.66                            | 1.04                             | 0.023                         |
| C14-N16      | $\partial$ | N16-H17         | $\partial^*$ | 0.56                            | 1.21                             | 0.023                         |
| C22-C24      | $\partial$ | C22-O30         | $\partial^*$ | 0.6                             | 1.09                             | 0.023                         |
| C24-H28      | $\partial$ | C22-C24         | $\partial^*$ | 0.59                            | 1.1                              | 0.023                         |
| C24-H28      | $\partial$ | C27-H29         | $\partial^*$ | 0.72                            | 0.94                             | 0.023                         |
| C1-H7        | $\partial$ | C2-H8           | $\partial^*$ | 0.74                            | 0.93                             | 0.024                         |
| C1-H7        | $\partial$ | C6-H38          | $\partial^*$ | 0.74                            | 0.94                             | 0.024                         |
| O30-H31      | $\partial$ | C21-C22         | $\partial^*$ | 4.73                            | 1.32                             | 0.071                         |
| C21-C23      | $\partial$ | C23-C25         | $\partial^*$ | 5                               | 1.3                              | 0.072                         |
| C2-C3        | $\partial$ | C3-C4           | $\partial^*$ | 5.25                            | 1.3                              | 0.074                         |
| C22-C24      | $\partial$ | C21-C22         | $\partial^*$ | 5.51                            | 1.29                             | 0.076                         |
| C19-H20      | $\partial$ | N16-N18         | $\partial^*$ | 8.89                            | 0.92                             | 0.081                         |
| S15          | LP2        | C14-N16         | $\partial^*$ | 15.09                           | 0.61                             | 0.087                         |
| S15          | LP2        | N12-C14         | $\partial^*$ | 12.58                           | 0.65                             | 0.082                         |
| S15          | LP         | N12-C14         | $\partial^*$ | 3.38                            | 1.16                             | 0.057                         |
| S15          | LP         | C14-N16         | $\partial^*$ | 2.92                            | 1.12                             | 0.052                         |
| S15          | LP2        | C9-H10          | $\partial^*$ | 0.78                            | 0.57                             | 0.019                         |
| O30          | LP2        | C22-C24         | $\pi^*$      | 31.93                           | 0.37                             | 0.103                         |
| N16          | LP         | N18-C19         | $\pi^*$      | 29.79                           | 0.32                             | 0.091                         |
| N12          | LP         | C14-S15         | $\partial^*$ | 68.04                           | 0.23                             | 0.117                         |
| N12          | LP         | C9-H11          | $\partial^*$ | 7.42                            | 0.66                             | 0.067                         |
| N12          | LP         | C14-N16         | $\partial^*$ | 0.66                            | 0.7                              | 0.02                          |
| Br32         | LP3        | C25-C27         | $\pi^*$      | 10.04                           | 0.32                             | 0.055                         |
| Br32         | LP         | C25-C27         | $\partial^*$ | 1.61                            | 1.58                             | 0.045                         |

**Table S6:** Natural bond orbital (NBO) analysis of investigated compound (6).

| Donor<br>(i) | Type       | Acceptor<br>(j) | Type         | E(2) <sup>a</sup><br>[kcal/mol] | E(j)-E(i) <sup>b</sup><br>[a.u.] | F(i,j) <sup>c</sup><br>[a.u.] |
|--------------|------------|-----------------|--------------|---------------------------------|----------------------------------|-------------------------------|
| C1-C2        | $\pi$      | C3-C4           | $\pi^*$      | 24.69                           | 0.3                              | 0.077                         |
| C1-C2        | $\pi$      | C5-C6           | $\pi^*$      | 21.31                           | 0.3                              | 0.072                         |
| C3-C4        | $\pi$      | C1-C2           | $\pi^*$      | 21.63                           | 0.3                              | 0.072                         |
| C3-C4        | $\pi$      | C5-C6           | $\pi^*$      | 24.27                           | 0.3                              | 0.077                         |
| C3-C4        | $\pi$      | C11-H12         | $\partial^*$ | 1.83                            | 0.64                             | 0.033                         |
| C3-C4        | $\pi$      | C11-N14         | $\partial^*$ | 3.37                            | 0.61                             | 0.044                         |
| C5-C6        | $\pi$      | C1-C2           | $\pi^*$      | 24.71                           | 0.29                             | 0.076                         |
| C5-C6        | $\pi$      | C3-C4           | $\pi^*$      | 22.12                           | 0.29                             | 0.072                         |
| N20-C21      | $\pi$      | N20-C21         | $\pi^*$      | 1.13                            | 0.39                             | 0.019                         |
| N20-C21      | $\pi$      | C23-C24         | $\partial^*$ | 1.19                            | 0.9                              | 0.029                         |
| N20-C21      | $\pi$      | C23-C25         | $\partial^*$ | 1.42                            | 0.91                             | 0.032                         |
| N20-C21      | $\pi$      | C23-C25         | $\pi^*$      | 4.77                            | 0.37                             | 0.041                         |
| C23-C25      | $\pi$      | N18-H19         | $\partial^*$ | 0.9                             | 0.65                             | 0.023                         |
| C23-C25      | $\pi$      | N20-C21         | $\partial^*$ | 1.34                            | 0.88                             | 0.033                         |
| C23-C25      | $\pi$      | N20-C21         | $\pi^*$      | 9.82                            | 0.32                             | 0.052                         |
| C23-C25      | $\pi$      | C21-H22         | $\partial^*$ | 1.9                             | 0.68                             | 0.035                         |
| C23-C25      | $\pi$      | C24-C26         | $\pi^*$      | 23.76                           | 0.29                             | 0.076                         |
| C23-C25      | $\pi$      | C27-C29         | $\pi^*$      | 19.36                           | 0.29                             | 0.068                         |
| C24-C26      | $\pi$      | C23-C25         | $\pi^*$      | 18.62                           | 0.31                             | 0.068                         |
| C24-C26      | $\pi$      | C24-C26         | $\pi^*$      | 0.53                            | 0.3                              | 0.011                         |
| C24-C26      | $\pi$      | C27-C29         | $\pi^*$      | 26.68                           | 0.3                              | 0.08                          |
| C27-C29      | $\pi$      | C23-C25         | $\pi^*$      | 24.16                           | 0.31                             | 0.078                         |
| C27-C29      | $\pi$      | C24-C26         | $\pi^*$      | 17.18                           | 0.3                              | 0.066                         |
| C1-C2        | $\partial$ | C1-C6           | $\partial^*$ | 3.55                            | 1.31                             | 0.061                         |
| C1-C2        | $\partial$ | C1-H7           | $\partial^*$ | 1.19                            | 1.12                             | 0.033                         |
| C1-C2        | $\partial$ | C2-C3           | $\partial^*$ | 4.25                            | 1.31                             | 0.067                         |
| C1-C2        | $\partial$ | C2-H8           | $\partial^*$ | 1.21                            | 1.12                             | 0.033                         |
| C1-C2        | $\partial$ | C3-C11          | $\partial^*$ | 4.03                            | 1.15                             | 0.061                         |
| C1-C2        | $\partial$ | C6-H10          | $\partial^*$ | 2.6                             | 1.12                             | 0.048                         |
| C29-H31      | $\partial$ | C26-H30         | $\partial^*$ | 0.81                            | 0.92                             | 0.024                         |
| C29-H31      | $\partial$ | C27-C29         | $\partial^*$ | 1.18                            | 1.11                             | 0.032                         |
| O32-H33      | $\partial$ | C23-C24         | $\partial^*$ | 4.74                            | 1.32                             | 0.071                         |
| C35-H36      | $\partial$ | C4-C5           | $\partial^*$ | 2.48                            | 1.11                             | 0.047                         |
| C35-H37      | $\partial$ | C4-C5           | $\partial^*$ | 1.9                             | 1.11                             | 0.041                         |
| C35-H38      | $\partial$ | C5-C6           | $\partial^*$ | 4.6                             | 1.1                              | 0.064                         |
| Br34         | LP(3)      | C27-C29         | $\pi^*$      | 10.03                           | 0.32                             | 0.055                         |
| S17          | LP(2)      | C3-C11          | $\partial^*$ | 0.91                            | 0.63                             | 0.022                         |
| S17          | LP(2)      | N14-C16         | $\partial^*$ | 12.89                           | 0.65                             | 0.083                         |
| S17          | LP(2)      | C16-N18         | $\partial^*$ | 15.4                            | 0.6                              | 0.087                         |
| O32          | LP(2)      | C24-C26         | $\pi^*$      | 31.97                           | 0.37                             | 0.104                         |
| Br34         | LP(2)      | C25-C27         | $\partial^*$ | 3.57                            | 0.88                             | 0.05                          |
| Br34         | LP(2)      | C27-C29         | $\partial^*$ | 3.63                            | 0.88                             | 0.05                          |
| N14          | LP(1)      | C11-H12         | $\partial^*$ | 3.47                            | 0.66                             | 0.046                         |
| N14          | LP(1)      | C11-H13         | $\partial^*$ | 7.53                            | 0.66                             | 0.068                         |
| N14          | LP(1)      | C16-S17         | $\partial^*$ | 55.03                           | 0.28                             | 0.114                         |
| S17          | LP(1)      | C16-N18         | $\partial^*$ | 2.97                            | 1.11                             | 0.052                         |
| N18          | LP(1)      | N20-C21         | $\pi^*$      | 31.28                           | 0.33                             | 0.094                         |

|      |       |         |              |       |      |       |
|------|-------|---------|--------------|-------|------|-------|
| N20  | LP(1) | C21-C23 | $\partial^*$ | 12.31 | 0.84 | 0.092 |
| O32  | LP(1) | C24-C26 | $\partial^*$ | 6.4   | 1.2  | 0.078 |
| Br34 | LP(1) | C25-C27 | $\partial^*$ | 1.65  | 1.58 | 0.046 |
| Br34 | LP(1) | C27-C29 | $\partial^*$ | 1.62  | 1.58 | 0.045 |

**Table S7:** Natural bond orbital (NBO) analysis of investigated compound (7).

| Donor<br>(i) | Type       | Acceptor<br>(j) | Type         | E(2) <sup>a</sup><br>[kcal/mol] | E(j)-E(i) <sup>b</sup><br>[a.u.] | F(i,j) <sup>c</sup><br>[a.u.] |
|--------------|------------|-----------------|--------------|---------------------------------|----------------------------------|-------------------------------|
| C24-C26      | $\pi$      | C27-C29         | $\pi^*$      | 26.71                           | 0.3                              | 0.08                          |
| C2-C3        | $\pi$      | C4-C5           | $\pi^*$      | 21.89                           | 0.3                              | 0.073                         |
| C23-C25      | $\pi$      | C27-C29         | $\pi^*$      | 19.33                           | 0.29                             | 0.068                         |
| C24-C26      | $\pi$      | C23-C25         | $\pi^*$      | 18.64                           | 0.31                             | 0.068                         |
| C23-C25      | $\pi$      | N20-C21         | $\pi^*$      | 9.61                            | 0.32                             | 0.052                         |
| N20-C21      | $\pi$      | C23-C25         | $\pi^*$      | 4.62                            | 0.37                             | 0.04                          |
| N20-C21      | $\pi$      | N20-C21         | $\pi^*$      | 1.13                            | 0.39                             | 0.019                         |
| C21-H22      | $\partial$ | N18-N20         | $\partial^*$ | 9.01                            | 0.92                             | 0.082                         |
| C2-H8        | $\partial$ | C3-C4           | $\partial^*$ | 4.78                            | 1.11                             | 0.065                         |
| C26-C29      | $\partial$ | C24-O32         | $\partial^*$ | 3.99                            | 1.08                             | 0.059                         |
| C24-C26      | $\partial$ | C21-C23         | $\partial^*$ | 3.01                            | 1.21                             | 0.054                         |
| C21-C23      | $\partial$ | C25-C27         | $\partial^*$ | 2.97                            | 1.25                             | 0.054                         |
| C11-N14      | $\partial$ | N14-C16         | $\partial^*$ | 1.95                            | 1.22                             | 0.044                         |
| N14-H15      | $\partial$ | C16-N18         | $\partial^*$ | 1.01                            | 1.09                             | 0.03                          |
| C1-H7        | $\partial$ | C1-C6           | $\partial^*$ | 0.99                            | 1.12                             | 0.03                          |
| C11-H13      | $\partial$ | C3-C11          | $\partial^*$ | 0.51                            | 0.95                             | 0.02                          |
| N14          | LP(1)      | C16-S17         | $\partial^*$ | 54.60                           | 0.28                             | 0.114                         |
| N18          | LP(1)      | C16-S17         | $\partial^*$ | 39.11                           | 0.29                             | 0.097                         |
| O32          | LP(2)      | C24-C26         | $\pi^*$      | 31.96                           | 0.37                             | 0.104                         |
| S17          | LP(2)      | C16-N18         | $\partial^*$ | 15.35                           | 0.6                              | 0.087                         |
| N20          | LP(1)      | N18-H19         | $\partial^*$ | 9.49                            | 0.74                             | 0.076                         |
| N18          | LP(1)      | C16-S17         | $\pi^*$      | 3.38                            | 0.56                             | 0.041                         |
| S17          | LP(1)      | N14-C16         | $\partial^*$ | 3.18                            | 1.16                             | 0.055                         |
| N14          | LP(1)      | C11-H12         | $\partial^*$ | 2.97                            | 0.66                             | 0.043                         |
| Br34         | LP(1)      | C25-C27         | $\partial^*$ | 1.65                            | 1.58                             | 0.046                         |
| N14          | LP(1)      | C16-S17         | $\pi^*$      | 0.81                            | 0.55                             | 0.02                          |
| N14          | LP(1)      | C3-C11          | $\partial^*$ | 0.55                            | 0.73                             | 0.019                         |

E<sup>(2)</sup> means energy of hyper conjugative interaction (stabilization energy in kcal/mol); Energy difference between donor & acceptor *i* & *j* NBO orbitals.; F(*i*; *j*) is the Fock matrix element between *i* & *j* NBO orbitals.

**Table S8:** Computed transition energy (eV), maximum absorption wavelengths ( $\lambda_{\max}$ /nm), oscillator strengths (*f*), and transition studies compounds (1-7).

| Compounds | DFT<br>$\lambda$ (nm) | E(eV) | <i>f</i> | MO contributions                    |
|-----------|-----------------------|-------|----------|-------------------------------------|
| <b>1</b>  | 392.94                | 3.16  | 0.002    | H→L (87%), H→L+3 (2%), H→L+5 (7%)   |
|           | 331.00                | 3.75  | 0.166    | H-1→L (85%), H-2→L (2%), H→L+1 (8%) |



|   |        |      |       |                                                                                                      |
|---|--------|------|-------|------------------------------------------------------------------------------------------------------|
|   | 315.16 | 3.93 | 0.038 | H→L+1 (52%), H→L+5 (10%), H-1→L (9%), H→L (8%), H→L+2 (8%), H→L+3 (8%)                               |
|   | 304.14 | 4.08 | 0.007 | H→L+1 (25%), H→L+2 (66%), H→L+3 (4%), H→L+5 (3%)                                                     |
|   | 293.70 | 4.22 | 0.017 | H→L+1 (10%), H→L+2 (21%), H→L+3 (50%), H→L+5 (12%), H→L (2%)                                         |
|   | 290.75 | 4.26 | 0.062 | H-2→L (80%), H-3→L (4%), H-2→L+3 (2%), H-1→L (3%), H-1→L+3 (4%)                                      |
| 2 | 388.91 | 3.19 | 0.001 | H→L (86%), H→L+1 (3%), H→L+5 (8%)                                                                    |
|   | 322.60 | 3.84 | 0.226 | H-1→L (94%), H-2→L (2%)                                                                              |
|   | 306.34 | 4.05 | 0.002 | H→L (12%), H→L+1 (33%), H→L+5 (31%), H→L+2 (3%), H→L+3 (8%), H→L+4 (5%), H→L+7 (2%)                  |
|   | 287.81 | 4.31 | 0.061 | H-2→L (75%), H-3→L (5%), H-2→L+1 (2%), H-1→L (2%), H-1→L+1 (5%), H→L+2 (4%)                          |
|   | 286.11 | 4.33 | 0.033 | H→L+1 (14%), H→L+2 (79%), H-2→L (4%)                                                                 |
|   | 277.41 | 4.47 | 0.003 | H→L+1 (47%), H→L+2 (11%), H→L+3 (16%), H→L+5 (17%), H→L+4 (3%), H→L+7 (2%)                           |
| 3 | 385.67 | 3.21 | 0.001 | H→L (84%), H→L+1 (4%), H→L+3 (4%), H→L+5 (7%)                                                        |
|   | 319.02 | 3.89 | 0.232 | H-1→L (94%), H-2→L (3%)                                                                              |
|   | 307.32 | 4.03 | 0.002 | H→L (14%), H→L+1 (40%), H→L+3 (14%), H→L+5 (22%), H→L+4 (2%), H→L+7 (2%), H→L+8 (2%)                 |
|   | 286.25 | 4.33 | 0.041 | H-2→L (71%), H-3→L (6%), H-1→L+1 (4%), H→L+2 (9%)                                                    |
|   | 283.94 | 4.37 | 0.034 | H→L+2 (89%), H-2→L (6%)                                                                              |
|   | 274.57 | 4.52 | 0.004 | H→L+1 (54%), H→L+3 (15%), H→L+5 (20%), H→L+4 (2%), H→L+7 (3%)                                        |
| 4 | 386.71 | 3.21 | 0.001 | H→L (84%), H→L+1 (4%), H→L+4 (3%), H→L+5 (8%)                                                        |
|   | 319.57 | 3.88 | 0.216 | H-1→L (94%), H-2→L (3%)                                                                              |
|   | 309.10 | 4.01 | 0.002 | H→L (14%), H→L+1 (44%), H→L+4 (11%), H→L+5 (24%), H→L+8 (3%)                                         |
|   | 285.84 | 4.34 | 0.057 | H-2→L (75%), H-3→L (7%), H-2→L+1 (2%), H-1→L (3%), H-1→L+1 (4%)                                      |
|   | 281.26 | 4.41 | 0.005 | H→L+2 (95%)                                                                                          |
|   | 275.81 | 4.50 | 0.008 | H→L+1 (50%), H→L+4 (15%), H→L+5 (28%), H→L+7 (3%)                                                    |
| 5 | 391.80 | 3.16 | 0.001 | H→L (87%), H→L+1 (4%), H→L+5 (5%)                                                                    |
|   | 328.18 | 3.78 | 0.174 | H-1→L (93%), H-2→L (3%)                                                                              |
|   | 312.37 | 3.97 | 0.007 | H→L (11%), H→L+1 (52%), H→L+5 (13%), H→L+2 (7%), H→L+3 (7%), H→L+8 (5%)                              |
|   | 291.47 | 4.25 | 0.089 | H-2→L (81%), H-3→L (5%), H-1→L (4%), H-1→L+1 (3%)                                                    |
|   | 278.71 | 4.45 | 0.029 | H-4→L (20%), H-3→L (38%), H-5→L (5%), H-2→L (5%), H-2→L+1 (3%), H-1→L+1 (9%), H→L+1 (5%), H→L+3 (2%) |
|   | 277.59 | 4.47 | 0.009 | H→L+1 (36%), H→L+2 (16%), H→L+3 (15%), H→L+5 (11%), H-4→L (4%), H-3→L (8%), H→L+4 (2%), H→L+8 (2%)   |
| 6 | 390.42 | 3.18 | 0.001 | H→L (86%), H→L+1 (3%), H→L+3 (3%), H→L+5 (7%)                                                        |
|   | 323.60 | 3.83 | 0.196 | H-1→L (95%), H-2→L (3%)                                                                              |
|   | 309.03 | 4.01 | 0.001 | H→L (12%), H→L+1 (37%), H→L+3 (14%), H→L+5 (25%), H→L+2 (4%), H→L+8 (3%)                             |
|   | 287.78 | 4.31 | 0.079 | H-2→L (78%), H-7→L+1 (2%), H-3→L (5%), H-2→L+1 (2%), H-1→L (3%), H-1→L+1 (5%)                        |

|   |        |      |       |                                                                                      |
|---|--------|------|-------|--------------------------------------------------------------------------------------|
|   | 280.56 | 4.42 | 0.017 | H→L+1 (54%), H→L+2 (18%), H→L+5 (13%), H→L+3 (9%), H→L+7 (2%)                        |
|   | 273.20 | 4.54 | 0.043 | H→L+2 (69%), H-3→L (3%), H-1→L+1 (5%), H→L+1 (3%), H→L+3 (9%), H→L+5 (6%)            |
|   | 389.53 | 3.18 | 0.001 | H→L (86%), H→L+1 (3%), H→L+5 (8%)                                                    |
|   | 322.20 | 3.85 | 0.199 | H-1→L (94%), H-2→L (3%)                                                              |
|   | 309.92 | 4.00 | 0.001 | H→L (13%), H→L+1 (39%), H→L+2 (11%), H→L+5 (27%), H→L+4 (3%), H→L+7 (2%), H→L+8 (3%) |
| 7 | 286.95 | 4.32 | 0.076 | H-2→L (75%), H-7→L+1 (2%), H-3→L (8%), H-2→L+1 (2%), H-1→L (3%), H-1→L+1 (5%)        |
|   | 279.78 | 4.43 | 0.013 | H→L+1 (54%), H→L+2 (20%), H→L+5 (17%), H→L+4 (2%), H→L+7 (3%)                        |
|   | 272.64 | 4.55 | 0.086 | H-4→L (30%), H-3→L (40%), H-2→L (12%), H-6→L (4%), H-2→L+1 (3%), H-1→L+1 (6%)        |

(H = HOMO, L = LUMO, H-1 = HOMO-1, etc.)

**Table S9:** Calculated vibrational frequencies of investigated compound (**1**).

| <i>Freq</i> | <i>I<sub>IR</sub></i> | Vibrational assignments                                                                      |
|-------------|-----------------------|----------------------------------------------------------------------------------------------|
| 3889        | 135                   | $\nu$ O-H                                                                                    |
| 3564        | 22                    | $\nu$ N-H                                                                                    |
| 3466        | 29                    | $\nu$ N-H                                                                                    |
| 3184        | 20                    | $\nu$ (s)C-H <sub>Ben</sub>                                                                  |
| 3174        | 26                    | $\nu$ (as)+(s)C-H <sub>Ben</sub>                                                             |
| 3151        | 15                    | $\nu$ (as) C-H <sub>BrBen</sub>                                                              |
| 3144        | 5                     | $\nu$ C-H                                                                                    |
| 3057        | 9                     | $\nu$ (as)C-H <sub>CH2</sub>                                                                 |
| 3008        | 24                    | $\nu$ (s)C-H <sub>CH2</sub>                                                                  |
| 1688        | 18                    | $\nu$ C=N + $\nu$ ( $\rho$ )N-H + $\nu$ ( $\rho$ )C-H                                        |
| 1643        | 26                    | $\nu$ (C=C-C=C <sub>Ben</sub> ) + $\nu$ ( $\rho$ )C-H <sub>BrBen</sub> + $\nu$ ( $\rho$ )O-H |
| 1627        | 15                    | $\nu$ (C=C-C=C <sub>Ben</sub> ) + $\nu$ ( $\delta$ )C-H <sub>BrBen</sub>                     |
| 1543        | 356                   | $\nu$ ( $\rho$ )N-H + $\nu$ C-N                                                              |
| 1520        | 6                     | $\nu$ ( $\rho$ )C-H <sub>Ben</sub> + $\nu$ C-C + $\nu$ ( $\rho$ )N-H                         |
| 1515        | 92                    | $\nu$ ( $\rho$ )C-H <sub>BrBen</sub> + $\nu$ C-O                                             |
| 1508        | 355                   | $\nu$ ( $\rho$ )N-H + $\nu$ C-N                                                              |
| 1477        | 15                    | $\nu$ ( $\delta$ )C-H <sub>CH2</sub> + $\nu$ ( $\rho$ + $\delta$ )C-H <sub>Ben</sub>         |
| 1473        | 19                    | $\nu$ ( $\delta$ )C-H <sub>CH2</sub> + $\nu$ ( $\rho$ + $\delta$ )C-H <sub>Ben</sub>         |
| 1436        | 97                    | $\nu$ (C=C-C=C <sub>Ben</sub> ) + $\nu$ ( $\delta$ )C-H <sub>BrBen</sub> + $\nu$ C-O         |
| 1397        | 22                    | $\nu$ C=S + $\nu$ ( $\rho$ )C-H + $\nu$ N-N                                                  |
| 1380        | 217                   | $\nu$ C=S + $\nu$ ( $\rho$ )N-H + $\nu$ C-N + $\nu$ (w)C-H <sub>CH2</sub>                    |
| 1361        | 336                   | $\nu$ C=S + $\nu$ ( $\rho$ )N-H + $\nu$ C-N + $\nu$ (w)C-H <sub>CH2</sub>                    |
| 1339        | 24                    | $\nu$ (C=C-C=C <sub>Ben</sub> ) + $\nu$ ( $\rho$ )C-H <sub>BrBen</sub> + $\nu$ ( $\rho$ )O-H |
| 1320        | 20                    | $\nu$ ( $\rho$ )C-H <sub>Ben</sub>                                                           |
| 1312        | 113                   | $\nu$ ( $\rho$ )C-H <sub>BrBen</sub> + $\nu$ C-O                                             |
| 1283        | 60                    | $\nu$ ( $\rho$ )C-H <sub>BrBen</sub> + $\nu$ ( $\rho$ )O-H                                   |
| 1244        | 369                   | $\nu$ ( $\rho$ )N-H + $\nu$ C-N + $\nu$ ( $\tau$ )C-H <sub>CH2</sub>                         |
| 1227        | 14                    | $\nu$ ( $\rho$ )C-H <sub>Ben</sub> + $\nu$ (w)C-H <sub>CH2</sub> + $\nu$ C-C                 |
| 1224        | 54                    | $\nu$ ( $\rho$ )C-H <sub>BrBen</sub> + $\nu$ N-N + $\nu$ ( $\rho$ )O-H                       |
| 1215        | 41                    | $\nu$ ( $\tau$ )C-H <sub>CH2</sub> + $\nu$ N-N + $\nu$ ( $\rho$ )N-H                         |

|      |     |                                                                                                                                 |
|------|-----|---------------------------------------------------------------------------------------------------------------------------------|
| 1172 | 61  | $\nu(\rho)\text{O-H} + \nu(\rho + \delta)\text{C-H}_{\text{BrBen}}$                                                             |
| 1119 | 100 | $\nu(\rho)\text{O-H} + \nu(\rho + \delta)\text{C-H}_{\text{BrBen}}$                                                             |
| 1098 | 6   | $\nu(\rho + \delta)\text{C-H}_{\text{Ben}}$                                                                                     |
| 1070 | 48  | $\nu \text{ N-N} + \nu \text{ C-N}$                                                                                             |
| 1047 | 6   | $\nu(\rho + \delta)\text{C-H}_{\text{Ben}}$                                                                                     |
| 974  | 8   | $\nu(\rho)\text{C-H}_{\text{CH}_2}$                                                                                             |
| 944  | 11  | $\nu(\tau)\text{C-H}_{\text{BrBen}} + \nu(\gamma)\text{C-H}_{\text{BrBen}}$                                                     |
| 922  | 17  | $\nu(\tau)\text{C-H}_{\text{BrBen}} + \nu(\gamma)\text{C-H}_{\text{BrBen}} + \nu(\gamma)\text{C-H}_{\text{Ben}}$                |
| 910  | 16  | $\nu \text{ C=S} + \nu(\tau)\text{C-H}_{\text{BrBen}} + \nu(\gamma)\text{C-H}_{\text{BrBen}} + \nu \text{ C-Br}_{\text{BrBen}}$ |
| 893  | 21  | $\nu(\gamma)\text{C-H} + \nu(\gamma)\text{C-H}_{\text{BrBen}} + \nu \text{ C-Br}_{\text{BrBen}}$                                |
| 864  | 29  | $\nu \text{ C-Br}_{\text{BrBen}} + \nu(\omega)\text{C-H}_{\text{CH}_2} + \nu \text{ C-Br}_{\text{BrBen}}$                       |
| 808  | 49  | $\nu(\omega)\text{C-H}_{\text{BrBen}}$                                                                                          |
| 797  | 36  | $\nu \text{ C=S} + \nu(\omega)\text{C-H}_{\text{Ben}}$                                                                          |
| 763  | 13  | $\nu(\omega)\text{C-H}_{\text{Ben}}$                                                                                            |
| 720  | 26  | $\nu(\omega)\text{C-H}_{\text{Ben}} + \nu(\gamma)\text{C-H}$                                                                    |

Frequencies are given in  $\text{cm}^{-1}$ ,  $\nu$ =stretching,  $\beta$ =in-plane bending,  $\gamma$ =out-plane bending  $\delta$ =scissoring,  $\rho$ =rocking,  $\omega$ =wagging,  $s$ =symmetric,  $as$ =asymmetric,  $\tau$ =twisting, ChBen = chlorobenzene, BrBen = bromobenzene.

**Table S10:** Calculated vibrational frequencies of investigated compound (2).

| <i>Freq</i> | <i>I<sub>IR</sub></i> | Vibrational assignments                                                                                       |
|-------------|-----------------------|---------------------------------------------------------------------------------------------------------------|
| 3889        | 135                   | $\nu \text{ O-H}$                                                                                             |
| 3578        | 20                    | $\nu \text{ N-H}$                                                                                             |
| 3466        | 29                    | $\nu \text{ N-H}$                                                                                             |
| 3194        | 7                     | $\nu(s) \text{ C-H}_{\text{Ben}}$                                                                             |
| 3183        | 14                    | $\nu(s) + \nu(as) \text{ C-H}_{\text{Ben}}$                                                                   |
| 3151        | 15                    | $\nu(as) \text{ C-H}_{\text{BrBen}}$                                                                          |
| 3146        | 5                     | $\nu \text{ C-H}$                                                                                             |
| 3086        | 5                     | $\nu(as) \text{ C-H}_{\text{CH}_2}$                                                                           |
| 3012        | 21                    | $\nu(s) \text{ C-H}_{\text{CH}_2}$                                                                            |
| 1689        | 18                    | $\nu \text{ C=N}$                                                                                             |
| 1671        | 11                    | $\nu (\text{C=C-C}=\text{C}_{\text{FlBen}})$                                                                  |
| 1643        | 26                    | $\nu (\text{C=C-C}=\text{C}_{\text{BrBen}})$                                                                  |
| 1641        | 16                    | $\nu (\text{C=C-C}=\text{C}_{\text{FlBen}}) + \nu(\delta) \text{ C-H}_{\text{FlBen}}$                         |
| 1626        | 14                    | $\nu (\text{C=C-C}=\text{C}_{\text{BrBen}}) + \nu(\rho) \text{ O-H} + \nu(\delta) \text{ C-H}_{\text{BrBen}}$ |
| 1550        | 180                   | $\nu(\rho) \text{ N-H}$                                                                                       |
| 1547        | 430                   | $\nu(\rho) \text{ N-H}$                                                                                       |
| 1524        | 70                    | $\nu(\rho) + \nu(\delta) \text{ C-H}_{\text{BrBen}}$                                                          |
| 1514        | 106                   | $\nu(\rho) \text{ O-H} + \nu(\rho) \text{ C-H}_{\text{BrBen}}$                                                |
| 1465        | 21                    | $\nu(\delta) \text{ C-H}_{\text{CH}_2}$                                                                       |
| 1435        | 93                    | $\nu(\rho) \text{ C-H} + \nu \text{ C-Br}$                                                                    |
| 1378        | 373                   | $\nu \text{ C=S}$                                                                                             |

|      |     |                                                      |
|------|-----|------------------------------------------------------|
| 1355 | 172 | $\nu(w)$ C-H <sub>CH2</sub>                          |
| 1313 | 92  | $\nu$ C-O + $\nu(\rho)$ C-H <sub>BrBen</sub>         |
| 1283 | 53  | $\nu(\rho)$ O-H + $\nu(\rho)$ C-H <sub>BrBen</sub>   |
| 1272 | 145 | $\nu$ C-F                                            |
| 1256 | 463 | $\nu(\rho)$ N-H                                      |
| 1224 | 43  | $\nu(\rho)$ O-H                                      |
| 1172 | 64  | $\nu(\rho)$ O-H + $\nu(\delta)$ C-H <sub>BrBen</sub> |
| 1119 | 106 | $\nu(\rho)$ O-H + $\nu(\delta)$ C-H <sub>BrBen</sub> |
| 1071 | 50  | $\nu$ C-N + $\nu$ N-N                                |
| 910  | 18  | $\nu(\tau)$ C-H <sub>BrBen</sub>                     |
| 895  | 18  | $\nu(\gamma)$ C-H                                    |
| 863  | 29  | $\nu(\tau) + \nu(w)$ C-H <sub>FlBen</sub>            |
| 856  | 19  | $\nu(\tau) + \nu(w)$ C-H <sub>FlBen</sub>            |
| 808  | 59  | $\nu(w)$ C-H <sub>BrBen</sub>                        |
| 796  | 23  | $\beta(C=C-C=C_{BrBen}) + \beta(C=C-C=C_{FlBen})$    |
| 765  | 58  | $\nu(w)$ C-H <sub>FlBen</sub>                        |

Frequencies are given in cm<sup>-1</sup>,  $\nu$  =stretching,  $\beta$ =in-plane bending,  $\gamma$ =out-plane bending  $\delta$ =scissoring,  $\rho$  =rocking,  $w$ = wagging,  $s$  =symmetric,  $as$ =asymmetric,  $\tau$ =twisting, Ben=benzene ring BrBen=Bromo benzene, FlBen=Fluro Benzene.

**Table S11:** Calculated vibrational frequencies of investigated compound (3).

| <i>Freq</i> | <i>I<sub>IR</sub></i> | Vibrational assignments                                            |
|-------------|-----------------------|--------------------------------------------------------------------|
| 3889        | 136                   | $\nu$ O-H                                                          |
| 3560        | 20                    | $\nu$ N-H                                                          |
| 3457        | 34                    | $\nu$ N-H                                                          |
| 3195        | 5                     | $\nu(s)$ C-H <sub>FlBen</sub>                                      |
| 3180        | 12                    | $\nu(s) + \nu(as)$ C-H <sub>FlBen</sub>                            |
| 3147        | 14                    | $\nu(as)$ C-H <sub>BrBen</sub>                                     |
| 3136        | 5                     | $\nu$ C-H                                                          |
| 3052        | 10                    | $\nu(as)$ C-H <sub>CH2</sub>                                       |
| 3009        | 25                    | $\nu(as)$ C-H <sub>CH2</sub>                                       |
| 1695        | 16                    | $\nu$ C=N                                                          |
| 1665        | 42                    | $\nu(\delta)$ C-H <sub>FlBen</sub> + $\nu(C=C-C=C_{FlBen})$        |
| 1649        | 27                    | $\nu(\rho)$ O-H + $\nu(C=C-C=C_{BrBen})$                           |
| 1644        | 59                    | $\nu$ C-F + $\nu(C=C-C=C_{FlBen})$                                 |
| 1629        | 14                    | $\nu(\rho)$ O-H                                                    |
| 1546        | 307                   | $\nu(\rho)$ N-H                                                    |
| 1519        | 156                   | $\nu(\rho)$ N-H + $\nu(\rho)$ O-H                                  |
| 1518        | 78                    | $\nu(\rho)$ N-H + $\nu(\rho)$ O-H + $\nu(\rho)$ C-H <sub>Ben</sub> |
| 1511        | 292                   | $\nu(\rho)$ N-H                                                    |
| 1479        | 51                    | $\nu(\delta)$ C-H <sub>CH2</sub> + $\nu$ C-F                       |
| 1438        | 94                    | $\nu(\rho)$ C-H + $\nu(\rho)$ O-H + $\nu(C=C-C=C_{BrBen})$         |

|      |     |                                                                              |
|------|-----|------------------------------------------------------------------------------|
| 1376 | 107 | $\nu$ C=S + $\nu(w)$ C-H <sub>CH2</sub>                                      |
| 1360 | 456 | $\nu$ C=S + $\nu(w)$ C-H <sub>CH2</sub> + $\nu$ C-N                          |
| 1344 | 35  | $\nu(\rho)$ O-H + $\nu$ C-H <sub>BrBen</sub>                                 |
| 1313 | 99  | $\nu$ O-H + $\nu(\rho)$ C-H <sub>BrBen</sub>                                 |
| 1294 | 52  | $\nu$ C-F + $\nu(\rho)$ C-H <sub>FlBen</sub> + $\nu(w)$ C-H <sub>CH2</sub>   |
| 1285 | 53  | $\nu(\rho)$ O-H + $\nu(\rho)$ C-H <sub>BrBen</sub>                           |
| 1273 | 126 | $\nu(\rho)$ N-H + $\nu$ C-N                                                  |
| 1239 | 319 | $\nu(\rho)$ N-H + $\nu$ C-N + $\nu(w)$ C-H <sub>CH2</sub>                    |
| 1227 | 45  | $\nu(\rho)$ C-H + $\nu(\rho)$ O-H + $\nu$ N-N                                |
| 1212 | 26  | $\nu(\tau)$ C-H <sub>CH2</sub> + $\nu$ N-N                                   |
| 1192 | 4   | $\nu(\tau)$ C-H <sub>CH2</sub> + $\nu$ N-N + $\nu$ C=S                       |
| 1173 | 68  | $\nu(\rho)$ O-H + $\nu(\delta)$ C-H <sub>BrBen</sub>                         |
| 1143 | 25  | $\nu(w)$ C-H <sub>CH2</sub>                                                  |
| 1120 | 99  | $\nu(\rho)$ O-H + $\nu(\delta)$ C-H <sub>BrBen</sub>                         |
| 1069 | 45  | $\nu$ C-N + $\nu$ N-N                                                        |
| 958  | 17  | $\nu(\rho)$ C-H <sub>CH2</sub>                                               |
| 947  | 16  | $\nu(\tau)$ C-H <sub>BrBen</sub> + $\nu(\gamma)$ C-H                         |
| 922  | 16  | $\nu(\tau)$ C-H <sub>BrBen</sub> + $\nu(\gamma)$ C-H                         |
| 914  | 20  | $\nu(\gamma)$ C-H                                                            |
| 895  | 24  | $\nu(\gamma)$ C-H <sub>BrBen</sub> + $\nu(\gamma)$ C-H                       |
| 873  | 25  | $\nu(\gamma)$ C-H <sub>FlBen</sub>                                           |
| 863  | 36  | $\beta$ (C=C-C=C <sub>BrBen</sub> )                                          |
| 810  | 50  | $\nu(w)$ C-H <sub>BrBen</sub>                                                |
| 802  | 42  | $\nu(\gamma)\nu$ (C=C-C=C <sub>FlBen</sub> ) + $\nu(w)$ C-H <sub>FlBen</sub> |

Frequencies are given in cm<sup>-1</sup>,  $\nu$ =stretching,  $\beta$ =in-plane bending,  $\gamma$ =out-plane bending  $\delta$ =scissoring,  $\rho$ =rocking,  $w$ = wagging,  $s$ =symmetric,  $as$ =asymmetric,  $\tau$ =twisting, Ben=benzene ring BrBen=Bromo benzene, FlBen=Fluro Benzene.

**Table S12:** Calculated vibrational frequencies of investigated compound (4).

| <i><sup>a</sup>Freq</i> | <i><sup>a</sup>I<sub>IR</sub></i> | Vibrational assignments                                                                           |
|-------------------------|-----------------------------------|---------------------------------------------------------------------------------------------------|
| 3887                    | 137                               | $\nu$ O-H                                                                                         |
| 3562                    | 21                                | $\nu$ N-H                                                                                         |
| 3454                    | 33                                | $\nu$ N-H                                                                                         |
| 3194                    | 4                                 | $\nu$ (s)C-H <sub>FlBen</sub>                                                                     |
| 3189                    | 3                                 | $\nu$ (s)C-H <sub>FlBen</sub>                                                                     |
| 3159                    | 7                                 | $\nu(as)$ C-H <sub>FlBen</sub>                                                                    |
| 3148                    | 6                                 | $\nu$ C-H                                                                                         |
| 3145                    | 14                                | $\nu(as)$ C-H <sub>BrBen</sub> + $\nu$ C-H                                                        |
| 3064                    | 7                                 | $\nu(as)$ C-H <sub>CH2</sub>                                                                      |
| 3010                    | 26                                | $\nu(s)$ C-H <sub>CH2</sub>                                                                       |
| 1693                    | 18                                | $\nu$ C=N + $\nu(\rho)$ N-H + $\nu(\rho)$ C-H                                                     |
| 1668                    | 39                                | $\nu$ (C=C-C=C <sub>Ben</sub> ) + $\nu(\delta)$ C-H <sub>FlBen</sub> + $\nu$ C-F <sub>FlBen</sub> |
| 1647                    | 27                                | $\nu$ (C=C-C=C <sub>Ben</sub> ) + $\nu(\rho)$ C-H <sub>BrBen</sub> + $\nu(\rho)$ O-H              |

|      |     |                                                                                                                                                           |
|------|-----|-----------------------------------------------------------------------------------------------------------------------------------------------------------|
| 1626 | 13  | $\nu(\text{C}=\text{C}-\text{C}=\text{C}_{\text{Ben}}) + \nu(\rho + \delta)\text{C}-\text{H}_{\text{BrBen}} + \nu(\rho)\text{O}-\text{H}$                 |
| 1546 | 61  | $\nu(\rho)\text{C}-\text{H}_{\text{FlBen}} + \nu \text{C}-\text{F}_{\text{FlBen}} + \nu(\rho)\text{N}-\text{H} + \nu \text{C}-\text{N}$                   |
| 1543 | 373 | $\nu(\rho)\text{N}-\text{H} + \nu \text{C}-\text{N}$                                                                                                      |
| 1516 | 103 | $\nu(\rho)\text{C}-\text{H}_{\text{BrBen}} + \nu \text{C}-\text{O} + \nu(\rho)\text{N}-\text{H} + \nu \text{C}-\text{N}$                                  |
| 1511 | 391 | $\nu(\rho)\text{N}-\text{H} + \nu \text{C}-\text{N}$                                                                                                      |
| 1474 | 21  | $\nu(\delta)\text{C}-\text{H}_{\text{CH}_2}$                                                                                                              |
| 1436 | 94  | $\nu(\text{C}=\text{C}-\text{C}=\text{C}_{\text{Ben}}) + \nu(\delta)\text{C}-\text{H}_{\text{Ben}} + \nu \text{C}-\text{O} + \nu(\rho)\text{O}-\text{H}$  |
| 1385 | 58  | $\nu \text{C}=\text{S} + \nu(\rho)\text{C}-\text{H}$                                                                                                      |
| 1379 | 134 | $\nu \text{C}=\text{S} + \nu(\omega)\text{C}-\text{H}_{\text{CH}_2} + \nu \text{C}-\text{N}$                                                              |
| 1360 | 393 | $\nu \text{C}=\text{S} + \nu(\omega)\text{C}-\text{H}_{\text{CH}_2} + \nu \text{C}-\text{N}$                                                              |
| 1342 | 29  | $\nu(\text{C}=\text{C}-\text{C}=\text{C}_{\text{Ben}}) + \nu(\rho)\text{C}-\text{H}_{\text{BrBen}} + \nu(\rho)\text{O}-\text{H}$                          |
| 1313 | 110 | $\nu(\rho)\text{C}-\text{H}_{\text{BrBen}} + \nu \text{C}-\text{O}$                                                                                       |
| 1284 | 79  | $\nu(\rho)\text{C}-\text{H}_{\text{BrBen}} + \nu(\rho)\text{O}-\text{H} + \nu \text{C}-\text{F}_{\text{FlBen}}$                                           |
| 1283 | 88  | $\nu \text{C}-\text{F}_{\text{FlBen}} + \nu(\rho) \text{C}-\text{H}_{\text{FlBen}} + \nu(\omega)\text{C}-\text{H}_{\text{CH}_2}$                          |
| 1246 | 366 | $\nu(\rho)\text{N}-\text{H} + \nu \text{C}-\text{N} + \nu(\tau)\text{C}-\text{H}_{\text{CH}_2}$                                                           |
| 1171 | 68  | $\nu(\rho + \delta)\text{C}-\text{H}_{\text{BrBen}} + \nu(\rho)\text{O}-\text{H}$                                                                         |
| 1156 | 20  | $\nu(\delta)\text{C}-\text{H}_{\text{FlBen}}$                                                                                                             |
| 1119 | 101 | $\nu(\delta)\text{C}-\text{H}_{\text{BrBen}} + \nu \text{C}-\text{Br}_{\text{BrBen}}$                                                                     |
| 1071 | 50  | $\nu \text{C}-\text{N} + \nu \text{N}-\text{N}$                                                                                                           |
| 1022 | 6   | $\nu(\rho)\text{C}-\text{H}_{\text{FlBen}}$                                                                                                               |
| 948  | 14  | $\nu(\tau)\text{C}-\text{H}_{\text{BrBen}} + \nu(\gamma)\text{C}-\text{H}_{\text{BrBen}}$                                                                 |
| 914  | 24  | $\nu(\tau)\text{C}-\text{H}_{\text{BrBen}} + \nu(\gamma)\text{C}-\text{H}_{\text{BrBen}} + \nu \text{C}-\text{Br}_{\text{BrBen}}$                         |
| 880  | 14  | $\nu(\gamma)\text{C}-\text{H} + \nu \text{C}-\text{F}_{\text{FlBen}} + \nu \text{C}-\text{Br}_{\text{BrBen}}$                                             |
| 846  | 46  | $\nu(\omega)\text{C}-\text{H}_{\text{FlBen}} + \nu \text{C}-\text{F}_{\text{FlBen}}$                                                                      |
| 802  | 14  | $\nu \text{C}=\text{S} + \nu(\omega)\text{C}-\text{H}_{\text{FlBen}} + \nu(\omega)\text{C}-\text{H}_{\text{CH}_2} + \nu \text{C}-\text{F}_{\text{FlBen}}$ |
| 793  | 26  | $\nu \text{C}=\text{S} + \nu(\rho)\text{N}-\text{H}$                                                                                                      |
| 628  | 20  | $\nu \text{C}-\text{Br}_{\text{BrBen}}$                                                                                                                   |

$\rho$ =rocking,  $\omega$ =wagging,  $s$ =symmetric,  $as$ =asymmetric,  $\tau$ =twisting, ChBen = chlorobenzene, BrBen = bromobenzene, FlBen = Florobenzene.

**Table S13:** Calculated vibrational frequencies of investigated compound (5).

| $^a\text{Freq}$ | $^aI_{IR}$ | Vibrational assignments                                                                                                                          |
|-----------------|------------|--------------------------------------------------------------------------------------------------------------------------------------------------|
| 3889            | 140        | $\nu\text{O}-\text{H}_{\text{Brph}}$                                                                                                             |
| 3570            | 18         | $\nu\text{N}-\text{H}$                                                                                                                           |
| 3455            | 32         | $\nu \text{N}-\text{H}$                                                                                                                          |
| 3180            | 26         | $\nu (s)\text{C}-\text{H}_{\text{Ben}}$                                                                                                          |
| 3165            | 17         | $\nu(as)+(s)\text{C}-\text{H}_{\text{Ben}}$                                                                                                      |
| 3148            | 14         | $\nu(as)\text{C}-\text{H}_{\text{Brph}} + \nu \text{C}-\text{H}$                                                                                 |
| 3142            | 17         | $\nu(as)\text{C}-\text{H}_{\text{Ben}}$                                                                                                          |
| 3111            | 15         | $\nu(s)+(as)\text{C}-\text{H}_{\text{CH}_3}$                                                                                                     |
| 3084            | 19         | $\nu(s)+(as)\text{C}-\text{H}_{\text{CH}_3}$                                                                                                     |
| 3062            | 15         | $\nu(as)\text{C}-\text{H}_{\text{CH}_2}$                                                                                                         |
| 3024            | 32         | $\nu(s)\text{C}-\text{H}_{\text{CH}_3}$                                                                                                          |
| 3021            | 32         | $\nu (s)\text{C}-\text{H}_{\text{CH}_2}$                                                                                                         |
| 1689            | 14         | $\nu \text{C}=\text{N} + \nu(\rho)\text{N}-\text{H} + \nu(\rho)\text{C}-\text{H}$                                                                |
| 1643            | 28         | $\nu(\text{C}=\text{C}-\text{C}=\text{C}_{\text{Brph}}) + \nu(\rho)\text{O}-\text{H}_{\text{Brph}} + \nu(\rho)\text{C}-\text{H}_{\text{Brph}}$   |
| 1626            | 15         | $\nu(\text{C}=\text{C}-\text{C}=\text{C}_{\text{Brph}}) + \nu(\rho)\text{O}-\text{H}_{\text{Brph}} + \nu(\delta)\text{C}-\text{H}_{\text{Brph}}$ |

|      |     |                                                                                                                         |
|------|-----|-------------------------------------------------------------------------------------------------------------------------|
| 1536 | 474 | $\nu$ C-N + $\nu(\rho)$ N-H                                                                                             |
| 1529 | 127 | $\nu$ C-N + $\nu(\rho)$ N-H                                                                                             |
| 1521 | 18  | $\nu$ (C=C-C=C <sub>Ben</sub> ) + $\nu$ ( $\delta + \rho$ )C-H <sub>Ben</sub> + $\nu(\tau + \delta)$ C-H <sub>CH3</sub> |
| 1515 | 105 | $\nu(\rho)$ O-H <sub>Brph</sub> + $\nu(\rho)$ C-H <sub>Brph</sub> + $\nu$ C-O <sub>Brph</sub> + $\nu(\rho)$ N-H         |
| 1484 | 11  | $\nu(\delta)$ C-H <sub>CH2</sub> + $\nu(\tau + \delta)$ C-H <sub>CH3</sub>                                              |
| 1466 | 12  | $\nu$ ( $\rho$ )C-H <sub>Ben</sub> + $\nu(\delta)$ C-H <sub>CH2</sub> + $\nu(\tau + \delta)$ C-H <sub>CH3</sub>         |
| 1433 | 96  | $\nu$ (C=C-C=C <sub>Brph</sub> ) + $\nu(\rho)$ O-H <sub>Brph</sub> + $\nu(\delta)$ C-H <sub>Brph</sub>                  |
| 1402 | 18  | $\nu$ (w)C-H <sub>CH3</sub> + $\nu$ C=S                                                                                 |
| 1388 | 304 | $\nu$ C=S + $\nu(\rho)$ N-H + $\nu$ C-N                                                                                 |
| 1350 | 210 | $\nu$ C=S + $\nu(\rho)$ N-H + $\nu$ (w)C-H <sub>CH2</sub>                                                               |
| 1339 | 31  | $\nu(\rho)$ O-H <sub>Brph</sub> + $\nu(\rho)$ C-H <sub>Brph</sub>                                                       |
| 1312 | 113 | $\nu(\rho)$ C-H <sub>Brph</sub> + $\nu$ C-O <sub>Brph</sub>                                                             |
| 1295 | 29  | $\nu$ ( $\rho$ )C-H <sub>Ben</sub>                                                                                      |
| 1281 | 54  | $\nu(\rho)$ C-H <sub>Brph</sub> + $\nu(\rho)$ O-H <sub>Brph</sub>                                                       |
| 1249 | 294 | $\nu(\rho)$ N-H + $\nu$ ( $\tau$ ) C-H <sub>CH2</sub> + $\nu$ C-N                                                       |
| 1238 | 79  | $\nu(\rho)$ N-H + $\nu$ (w)C-H <sub>CH2</sub> + $\nu$ ( $\delta + \rho$ )C-H <sub>Ben</sub>                             |
| 1217 | 25  | $\nu$ ( $\tau$ )C-H <sub>CH2</sub> + $\nu(\rho)$ N-H + $\nu(\rho)$ O-H <sub>Brph</sub>                                  |
| 1171 | 64  | $\nu$ ( $\delta + \rho$ )C-H <sub>Brph</sub> + $\nu(\rho)$ O-H <sub>Brph</sub>                                          |
| 1118 | 97  | $\nu$ ( $\delta + \rho$ )C-H <sub>Brph</sub> + $\nu(\rho)$ O-H <sub>Brph</sub>                                          |
| 1076 | 8   | $\nu$ ( $\delta + \rho$ )C-H <sub>Ben</sub>                                                                             |
| 1065 | 56  | $\nu$ C-N + $\nu(\rho)$ C-H                                                                                             |
| 971  | 11  | $\nu$ (w + $\tau$ ) C-H <sub>Ben</sub> + $\nu(\rho)$ N-H + $\nu(\rho)$ C-H <sub>CH2</sub>                               |
| 949  | 18  | $\nu$ ( $\tau + \beta$ ) C-H <sub>Brph</sub> + $\nu(\beta)$ C-H                                                         |
| 923  | 14  | $\nu$ ( $\tau + \beta$ ) C-H <sub>Brph</sub> + $\nu(\beta)$ C-H + $\nu$ C=S                                             |
| 864  | 29  | $\nu(\beta)$ C-H + $\nu(\rho)$ N-H                                                                                      |
| 862  | 9   | $\nu(\beta)$ C-H                                                                                                        |
| 855  | 23  | $\nu(\beta)$ C-H + $\nu(\rho)$ N-H                                                                                      |
| 810  | 44  | $\nu$ (w) C-H <sub>Brph</sub>                                                                                           |
| 794  | 38  | $\nu$ C=S + $\nu$ (w) C-H <sub>Ben</sub>                                                                                |
| 755  | 23  | $\nu$ (w) C-H <sub>Ben</sub>                                                                                            |

Frequencies are given in  $\text{cm}^{-1}$ ,  $\nu$ =stretching,  $\beta$ =in-plane bending,  $\gamma$ =out-plane bending  $\delta$ =scissoring,  $\rho$ =rocking,  $w$ = wagging,  $s$  =symmetric,  $as$ =asymmetric,  $\tau$ =twisting, 4-bromophenol = Brph, Ben=benzene ring.

**Table S14:** Calculated vibrational frequencies of investigated compound (6).

| <i><sup>a</sup>Freq</i> | <i><sup>a</sup>I<sub>IR</sub></i> | Vibrational assignments          |
|-------------------------|-----------------------------------|----------------------------------|
| 3889                    | 135                               | $\nu$ O-H <sub>Brph</sub>        |
| 3565                    | 24                                | $\nu$ N-H                        |
| 3454                    | 30                                | $\nu$ N-H                        |
| 3171                    | 21                                | $\nu$ (s)C-H <sub>Ben</sub>      |
| 3153                    | 17                                | $\nu(as)+(s)$ C-H <sub>Ben</sub> |
| 3146                    | 14                                | $\nu(as)$ C-H <sub>Brph</sub>    |
| 3139                    | 5                                 | $\nu$ C-H                        |
| 3130                    | 13                                | $\nu$ C-H <sub>Ben</sub>         |
| 3109                    | 18                                | $\nu(s)+(as)$ C-H <sub>CH3</sub> |
| 3086                    | 14                                | $\nu(as)$ C-H <sub>CH3</sub>     |

|      |     |                                                                                                                                    |
|------|-----|------------------------------------------------------------------------------------------------------------------------------------|
| 3059 | 10  | $\nu(\text{as})\text{C-H}_{\text{CH}_2}$                                                                                           |
| 3019 | 28  | $\nu(\text{s})\text{C-H}_{\text{CH}_3}$                                                                                            |
| 3016 | 23  | $\nu(\text{s})\text{C-H}_{\text{CH}_2}$                                                                                            |
| 1694 | 19  | $\nu \text{C}=\text{N} + \nu(\rho)\text{N-H} + \nu(\rho)\text{C-H}$                                                                |
| 1664 | 13  | $\nu(\text{C}=\text{C}-\text{C}=\text{C}_{\text{Ben}}) + \nu(\delta + \rho)\text{C-H}_{\text{Ben}}$                                |
| 1649 | 27  | $\nu(\text{C}=\text{C}-\text{C}=\text{C}_{\text{Brph}}) + \nu(\rho)\text{O-H}_{\text{Brph}} + \nu(\rho)\text{C-H}_{\text{Brph}}$   |
| 1628 | 14  | $\nu(\text{C}=\text{C}-\text{C}=\text{C}_{\text{Brph}}) + \nu(\delta + \rho)\text{C-H}_{\text{Brph}}$                              |
| 1545 | 304 | $\nu \text{C-N} + \nu(\rho)\text{N-H}$                                                                                             |
| 1518 | 99  | $\nu(\rho)\text{O-H}_{\text{Brph}} + \nu(\rho)\text{C-H}_{\text{Brph}} + \nu\text{C-O}_{\text{Brph}} + \nu(\rho)\text{N-H}$        |
| 1518 | 17  | $\nu(\rho)\text{O-H}_{\text{Brph}} + \nu(\rho)\text{C-H}_{\text{Brph}} + \nu\text{C-O}_{\text{Brph}} + \nu(\rho)\text{N-H}$        |
| 1512 | 404 | $\nu \text{C-N} + \nu(\rho)\text{N-H}$                                                                                             |
| 1487 | 15  | $\nu(\delta + \rho)\text{C-H}_{\text{Ben}} + \nu(\tau + \delta) \text{C-H}_{\text{CH}_3}$                                          |
| 1475 | 28  | $\nu(\delta)\text{C-H}_{\text{CH}_2}$                                                                                              |
| 1470 | 9   | $\nu(\tau + \delta) \text{C-H}_{\text{CH}_3}$                                                                                      |
| 1437 | 94  | $\nu(\text{C}=\text{C}-\text{C}=\text{C}_{\text{Brph}}) + \nu(\rho)\text{O-H}_{\text{Brph}} + \nu(\delta)\text{C-H}_{\text{Brph}}$ |
| 1402 | 18  | $\nu(\rho)\text{C-H} + \nu \text{N-N}$                                                                                             |
| 1380 | 129 | $\nu \text{C}=\text{S} + \nu(\rho)\text{N-H} + \nu(\text{w})\text{C-H}_{\text{CH}_2}$                                              |
| 1361 | 421 | $\nu \text{C}=\text{S} + \nu(\rho)\text{N-H} + \nu(\text{w})\text{C-H}_{\text{CH}_2} + \nu \text{C-N}$                             |
| 1344 | 27  | $\nu(\text{C}=\text{C}-\text{C}=\text{C}_{\text{Brph}}) + \nu(\rho)\text{O-H}_{\text{Brph}} + \nu(\rho)\text{C-H}_{\text{Brph}}$   |
| 1341 | 19  | $\nu(\text{C}=\text{C}-\text{C}=\text{C}_{\text{Ben}}) + \nu(\rho)\text{C-H}_{\text{Ben}} + \nu(\text{w})\text{C-H}_{\text{CH}_2}$ |
| 1313 | 94  | $\nu(\rho)\text{C-H}_{\text{Brph}} + \nu\text{C-O}_{\text{Brph}}$                                                                  |
| 1309 | 19  | $\nu(\rho)\text{C-H}_{\text{Ben}}$                                                                                                 |
| 1285 | 57  | $\nu(\rho)\text{O-H}_{\text{Brph}} + \nu(\rho)\text{C-H}_{\text{Brph}}$                                                            |
| 1272 | 28  | $\nu(\delta + \rho)\text{C-H}_{\text{Ben}} + \nu(\rho)\text{N-H} + \nu(\text{w})\text{C-H}_{\text{CH}_2}$                          |
| 1242 | 356 | $\nu(\rho)\text{N-H} + \nu(\tau) \text{C-H}_{\text{CH}_2} + \nu \text{N-H}$                                                        |
| 1227 | 67  | $\nu(\rho)\text{O-H}_{\text{Brph}} + \nu(\text{w})\text{C-H}_{\text{CH}_2} + \nu(\rho)\text{N-H} + \nu \text{N-N}$                 |
| 1223 | 28  | $\nu(\rho)\text{O-H}_{\text{Brph}} + \nu(\text{w})\text{C-H}_{\text{CH}_2} + \nu(\rho)\text{N-H}$                                  |
| 1183 | 2   | $\nu(\rho)\text{C-H}_{\text{Ben}} + \nu(\text{w})\text{C-H}_{\text{CH}_2}$                                                         |
| 1173 | 66  | $\nu(\delta + \rho)\text{C-H}_{\text{Brph}} + \nu(\rho)\text{O-H}_{\text{Brph}}$                                                   |
| 1119 | 98  | $\nu(\delta + \rho)\text{C-H}_{\text{Brph}} + \nu(\rho)\text{O-H}_{\text{Brph}}$                                                   |
| 1113 | 6   | $\nu(\rho)\text{C-H}_{\text{Ben}}$                                                                                                 |
| 1071 | 47  | $\nu \text{C-N} + \nu \text{N-N} + \nu(\rho)\text{C-H}$                                                                            |
| 1051 | 5   | $\nu(\tau + \text{w}) \text{C-H}_{\text{CH}_3} + \nu(\beta) \text{C-H}_{\text{Ben}}$                                               |
| 975  | 6   | $\nu(\rho)\text{C-H}_{\text{CH}_2} + \nu(\tau + \text{w}) \text{C-H}_{\text{CH}_3}$                                                |
| 946  | 16  | $\nu(\tau + \beta) \text{C-H}_{\text{Brph}} + \nu(\beta) \text{C-H}$                                                               |
| 923  | 23  | $\nu(\tau + \beta) \text{C-H}_{\text{Brph}} + \nu(\beta) \text{C-H}$                                                               |
| 920  | 5   | $\nu(\tau + \beta) \text{C-H}_{\text{Brph}} + \nu(\beta) \text{C-H} + \nu(\beta) \text{C-H}_{\text{Ben}}$                          |
| 894  | 20  | $\nu(\beta) \text{C-H}$                                                                                                            |
| 863  | 41  | $\nu \text{C-O}_{\text{Brph}} + \nu(\rho)\text{N-H}$                                                                               |
| 810  | 59  | $\nu(\text{w}) \text{C-H}_{\text{Brph}} + \nu(\text{w})\text{C-H}_{\text{Ben}}$                                                    |
| 807  | 23  | $\nu(\text{w}) \text{C-H}_{\text{Brph}} + \nu(\text{w})\text{C-H}_{\text{Ben}}$                                                    |
| 790  | 27  | $\nu(\text{w})\text{C-H}_{\text{Ben}} + \nu(\rho)\text{N-H}$                                                                       |
| 769  | 10  | $\nu(\text{w})\text{C-H}_{\text{Ben}} + \nu(\text{w})\text{C-H}_{\text{CH}_2} + \nu(\rho)\text{N-H}$                               |
| 630  | 16  | $\nu \text{C}=\text{S} + \nu \text{C-Br}$                                                                                          |

Frequencies are given in  $\text{cm}^{-1}$ ,  $\nu$ =stretching,  $\beta$ =in-plane bending,  $\gamma$ =out-plane bending  $\delta$ =scissoring,  $\rho$ =rocking,  $w$ =wagging,  $s$ =symmetric,  $as$ =asymmetric,  $\tau$ =twisting, 4-bromophenol = Brph, Ben=benzene ring.



**Table S15:** Calculated vibrational frequencies of investigated compound (7).

| <i><sup>a</sup>Freq</i> | <i><sup>a</sup>I<sub>IR</sub></i> | Vibrational assignments                                                                                     |
|-------------------------|-----------------------------------|-------------------------------------------------------------------------------------------------------------|
| 3887                    | 136                               | $\nu$ O-H                                                                                                   |
| 3565                    | 23                                | $\nu$ N-H                                                                                                   |
| 3451                    | 31                                | $\nu$ N-H                                                                                                   |
| 3161                    | 27                                | $\nu$ (s)C-H <sub>Ben</sub>                                                                                 |
| 3147                    | 9                                 | $\nu$ (as)C-H <sub>Ben</sub>                                                                                |
| 3145                    | 14                                | $\nu$ (as)C-H <sub>BrBen</sub>                                                                              |
| 3143                    | 14                                | $\nu$ (as)C-H <sub>Ben</sub>                                                                                |
| 3110                    | 14                                | $\nu$ (s) + (as)C-H <sub>CH3</sub>                                                                          |
| 3082                    | 14                                | $\nu$ (s) + (as)C-H <sub>CH3</sub>                                                                          |
| 3061                    | 8                                 | $\nu$ (as)C-H <sub>CH2</sub>                                                                                |
| 3016                    | 35                                | $\nu$ (s)C-H <sub>CH3</sub>                                                                                 |
| 3010                    | 25                                | $\nu$ (s)C-H <sub>CH2</sub>                                                                                 |
| 1692                    | 20                                | $\nu$ C=N + $\nu$ ( $\rho$ )N-H + $\nu$ ( $\rho$ )C-H                                                       |
| 1647                    | 28                                | $\nu$ (C=C-C=C <sub>Ben</sub> ) + $\nu$ ( $\rho$ )C-H <sub>BrBen</sub> + $\nu$ ( $\rho$ )O-H                |
| 1626                    | 13                                | $\nu$ (C=C-C=C <sub>Ben</sub> ) + $\nu$ ( $\rho$ )C-H <sub>BrBen</sub> + $\nu$ ( $\rho$ )O-H                |
| 1534                    | 463                               | $\nu$ ( $\rho$ )N-H + $\nu$ C-N                                                                             |
| 1516                    | 116                               | $\nu$ ( $\rho$ )C-H <sub>BrBen</sub> + $\nu$ ( $\rho$ )N-H + $\nu$ ( $\rho$ )O-H                            |
| 1510                    | 184                               | $\nu$ ( $\rho$ )N-H + $\nu$ C-N                                                                             |
| 1474                    | 20                                | $\nu$ ( $\delta$ )C-H <sub>CH2</sub>                                                                        |
| 1471                    | 19                                | $\nu$ ( $\tau$ + $\delta$ )C-H <sub>CH3</sub>                                                               |
| 1459                    | 9                                 | $\nu$ ( $\tau$ + $\delta$ )C-H <sub>CH3</sub>                                                               |
| 1436                    | 92                                | $\nu$ ( $\delta$ + $\rho$ )C-H <sub>BrBen</sub> + $\nu$ ( $\rho$ )O-H                                       |
| 1381                    | 223                               | $\nu$ C=S + $\nu$ ( $\rho$ )N-H + $\nu$ C-N + $\nu$ ( $\rho$ )C-H                                           |
| 1376                    | 56                                | $\nu$ (w)C-H <sub>CH2</sub> + $\nu$ ( $\rho$ )C-H + $\nu$ C-N                                               |
| 1357                    | 289                               | $\nu$ C=S + $\nu$ (w)C-H <sub>CH2</sub> + $\nu$ ( $\rho$ )C-H                                               |
| 1342                    | 33                                | $\nu$ ( $\rho$ )C-H <sub>BrBen</sub> + $\nu$ ( $\rho$ )C-H + $\nu$ ( $\rho$ )O-H                            |
| 1325                    | 15                                | $\nu$ (C=C-C=C <sub>Ben</sub> ) + $\nu$ (w)C-H <sub>CH2</sub>                                               |
| 1314                    | 20                                | $\nu$ ( $\rho$ )C-H <sub>Ben</sub>                                                                          |
| 1313                    | 103                               | $\nu$ ( $\rho$ )C-H <sub>Ben</sub>                                                                          |
| 1284                    | 60                                | $\nu$ ( $\rho$ )C-H <sub>BrBen</sub>                                                                        |
| 1242                    | 289                               | $\nu$ ( $\tau$ )C-H <sub>CH2</sub> + $\nu$ ( $\rho$ )N-H                                                    |
| 1241                    | 25                                | $\nu$ (w)C-H <sub>CH3</sub> + $\nu$ C-C                                                                     |
| 1228                    | 61                                | $\nu$ ( $\rho$ )C-H <sub>Ben</sub> + $\nu$ (w)C-H <sub>CH2</sub>                                            |
| 1171                    | 67                                | $\nu$ ( $\rho$ + $\delta$ )C-H <sub>ChBen</sub> + $\nu$ ( $\rho$ )O-H                                       |
| 1119                    | 104                               | $\nu$ ( $\rho$ + $\delta$ )C-H <sub>ChBen</sub> + $\nu$ ( $\rho$ )O-H                                       |
| 1070                    | 46                                | $\nu$ C-N + $\nu$ N-N + $\nu$ (w)C-H <sub>CH2</sub>                                                         |
| 1048                    | 11                                | $\nu$ ( $\tau$ + w)C-H <sub>CH3</sub>                                                                       |
| 948                     | 13                                | $\nu$ ( $\tau$ )C-H <sub>BrBen</sub> + $\nu$ ( $\gamma$ )C-H <sub>BrBen</sub> + $\nu$ C-Br <sub>BrBen</sub> |
| 921                     | 12                                | $\nu$ ( $\tau$ )C-H <sub>BrBen</sub> + $\nu$ ( $\gamma$ )C-H <sub>BrBen</sub> + $\nu$ C-Br <sub>BrBen</sub> |
| 913                     | 23                                | $\nu$ ( $\gamma$ )C-H <sub>BrBen</sub> + $\nu$ ( $\tau$ )C-H <sub>BrBen</sub> + $\nu$ C-Br <sub>BrBen</sub> |
| 823                     | 33                                | $\nu$ (w)C-H <sub>Ben</sub>                                                                                 |
| 805                     | 43                                | $\nu$ (w)C-H <sub>BrBen</sub>                                                                               |

Frequencies are given in cm<sup>-1</sup>,  $\nu$ =stretching,  $\beta$ =in-plane bending,  $\gamma$ =out-plane bending  $\delta$ =scissoring,  $\rho$ =rocking, w= wagging, s =symmetric, as=asymmetric,  $\tau$ =twisting, ChBen = chlorobenzene, BrBen = bromobenzene.

**Table S16:** Computed molecular orbitals energies and their band gap for (1-7).

| Compounds | $E_{\text{HOMO-1}}$ | $E_{\text{LUMO+1}}$ | $\Delta E$ | $E_{\text{HOMO-2}}$ | $E_{\text{LUMO+2}}$ | $\Delta E$ |
|-----------|---------------------|---------------------|------------|---------------------|---------------------|------------|
| 1         | -6.272              | -0.765              | 5.507      | -6.830              | -0.502              | 6.328      |
| 2         | -6.259              | -0.745              | 5.514      | -6.826              | -0.710              | 6.116      |
| 3         | -6.354              | -0.801              | 5.553      | -6.902              | -0.753              | 6.149      |
| 4         | -6.344              | -0.824              | 5.52       | -6.904              | -0.722              | 6.182      |
| 5         | -6.277              | -0.835              | 5.442      | -6.825              | -0.454              | 6.371      |
| 6         | -6.233              | -0.754              | 5.479      | -6.812              | -0.476              | 6.336      |
| 7         | -6.236              | -0.751              | 5.485      | -6.805              | -0.410              | 6.395      |

Band gap ( $\Delta E$ ) =  $E_{\text{LUMO+1}} - E_{\text{HOMO-1}}$ . Units are in  $eV$ .

**Table S17:** Global reactivity descriptors of studied compound (1-7).

| Compounds | $IP$ | $EA$ | $X$  | $\eta$ | $\mu$ | $\omega$ | $\sigma$ |
|-----------|------|------|------|--------|-------|----------|----------|
| 1         | 5.76 | 1.59 | 3.68 | 2.08   | -3.68 | 3.25     | 0.24     |
| 2         | 5.76 | 1.58 | 3.67 | 2.09   | -3.67 | 3.22     | 0.24     |
| 3         | 5.84 | 1.62 | 3.73 | 2.11   | -3.73 | 3.30     | 0.24     |
| 4         | 5.82 | 1.62 | 3.72 | 2.10   | -3.72 | 3.30     | 0.24     |
| 5         | 5.78 | 1.65 | 3.72 | 2.06   | -3.72 | 3.35     | 0.24     |
| 6         | 5.72 | 1.57 | 3.64 | 2.08   | -3.64 | 3.20     | 0.24     |
| 7         | 5.71 | 1.55 | 3.63 | 2.08   | -3.63 | 3.171    | 0.24     |

$IP$ = ionization potential,  $EA$ = electron affinity,  $X$ = electro negativity,  $\mu$ =chemical potential,  $\eta$ =global hardness,  $\sigma$ = global softness and  $\omega$ = global electrophilicity. Units in  $eV$

**Table S18:** Dipole moment ( $\mu$ ) and major contributing tensor (D.) of the prepared compounds (1-7).

| Dipole Moment | 1      | 2      | 3      | 4      | 5      | 6      | 7      |
|---------------|--------|--------|--------|--------|--------|--------|--------|
| $\mu_x$       | 3.1307 | 2.5773 | 2.7209 | 3.3114 | 3.9315 | 2.6485 | 1.9746 |
| $\mu_y$       | 4.5554 | 5.4482 | 3.3246 | 3.8725 | 4.8153 | 5.2727 | 5.6294 |
| $\mu_z$       | 5.0734 | 4.0903 | 5.6257 | 4.6153 | 4.2805 | 4.9536 | 4.9313 |
| $\mu_{total}$ | 7.5028 | 7.2839 | 7.0785 | 6.8747 | 7.5476 | 7.7041 | 7.7400 |

**Table S19:** Dipole polarizability and major contributing tensor ( $a.u.$ ) of the studied compounds.

| Polarizability   | 1      | 2      | 3      | 4      | 5      | 6      | 7      |
|------------------|--------|--------|--------|--------|--------|--------|--------|
| $\alpha_{xx}$    | 329.26 | 308.20 | 330.32 | 321.56 | 356.80 | 331.75 | 338.25 |
| $\alpha_{yy}$    | 366.73 | 355.66 | 367.13 | 367.03 | 384.21 | 392.26 | 391.91 |
| $\alpha_{zz}$    | 226.57 | 252.09 | 220.96 | 228.51 | 233.78 | 247.00 | 243.32 |
| $\alpha_{total}$ | 307.52 | 305.32 | 306.14 | 305.70 | 324.93 | 323.67 | 324.49 |

**Table S20:** Hyperpolarizabilities  $\beta_{total}$  and major contributing tensor ( $a.u.$ ) of the prepared compounds.

| Hyperpolarizability | 1       | 2       | 3       | 4       | 5       | 6       | 7       |
|---------------------|---------|---------|---------|---------|---------|---------|---------|
| $\beta_{xxx}$       | -287.75 | -344.79 | -290.15 | -181.55 | -180.81 | -207.20 | -145.61 |
| $\beta_{xxy}$       | -269.03 | -261.52 | -258.44 | -365.97 | -198.95 | -269.33 | -336.95 |
| $\beta_{xyy}$       | -3.16   | 4.98    | -170.54 | 15.22   | -87.62  | -75.16  | -1.53   |
| $\beta_{yyy}$       | 164.51  | 137.07  | 14.96   | -32.76  | 153.95  | 88.66   | 88.22   |
| $\beta_{xxz}$       | -92.52  | -140.09 | -106.84 | -99.17  | -122.35 | -132.87 | -100.99 |
| $\beta_{yyz}$       | -15.05  | -114.73 | 76.45   | -80.44  | -97.29  | 59.60   | -40.11  |
| $\beta_{xzz}$       | 3.41    | -52.27  | 19.27   | -13.49  | 37.63   | 30.52   | -51.93  |
| $\beta_{yzz}$       | 56.42   | 113.11  | -0.99   | 44.28   | 57.40   | 43.46   | 71.10   |
| $\beta_{zzz}$       | 72.10   | 9.16    | 92.50   | 86.48   | 24.57   | 51.76   | 103.47  |
| $\beta_{total}$     | 293.64  | 462.82  | 508.41  | 408.22  | 302.44  | 387.60  | 269.44  |

**Table S21:** The second hyperpolarizabilities  $\langle\gamma\rangle$  and major  $\gamma$  tensor (*a.u.*) of the prepared compounds.

| 2 <sup>nd</sup> Hyper pol. | 1                 | 2                 | 3                 | 4                 | 5                 | 6                 | 7                 |
|----------------------------|-------------------|-------------------|-------------------|-------------------|-------------------|-------------------|-------------------|
| $\gamma_X$                 | $8.96\times 10^4$ | $8.29\times 10^4$ | $1.01\times 10^4$ | $8.23\times 10^4$ | $9.53\times 10^4$ | $8.40\times 10^4$ | $8.55\times 10^4$ |
| $\gamma_Y$                 | $5.08\times 10^4$ | $4.73\times 10^4$ | $8.44\times 10^4$ | $5.42\times 10^4$ | $6.07\times 10^4$ | $5.71\times 10^4$ | $6.06\times 10^4$ |
| $\gamma_Z$                 | $1.42\times 10^4$ | $1.48\times 10^4$ | $5.32\times 10^4$ | $1.34\times 10^4$ | $1.31\times 10^4$ | $1.60\times 10^4$ | $1.43\times 10^4$ |
| $\langle\gamma\rangle$     | $1.54\times 10^5$ | $1.45\times 10^5$ | $1.51\times 10^5$ | $1.50\times 10^5$ | $1.69\times 10^5$ | $1.57\times 10^5$ | $1.60\times 10^5$ |

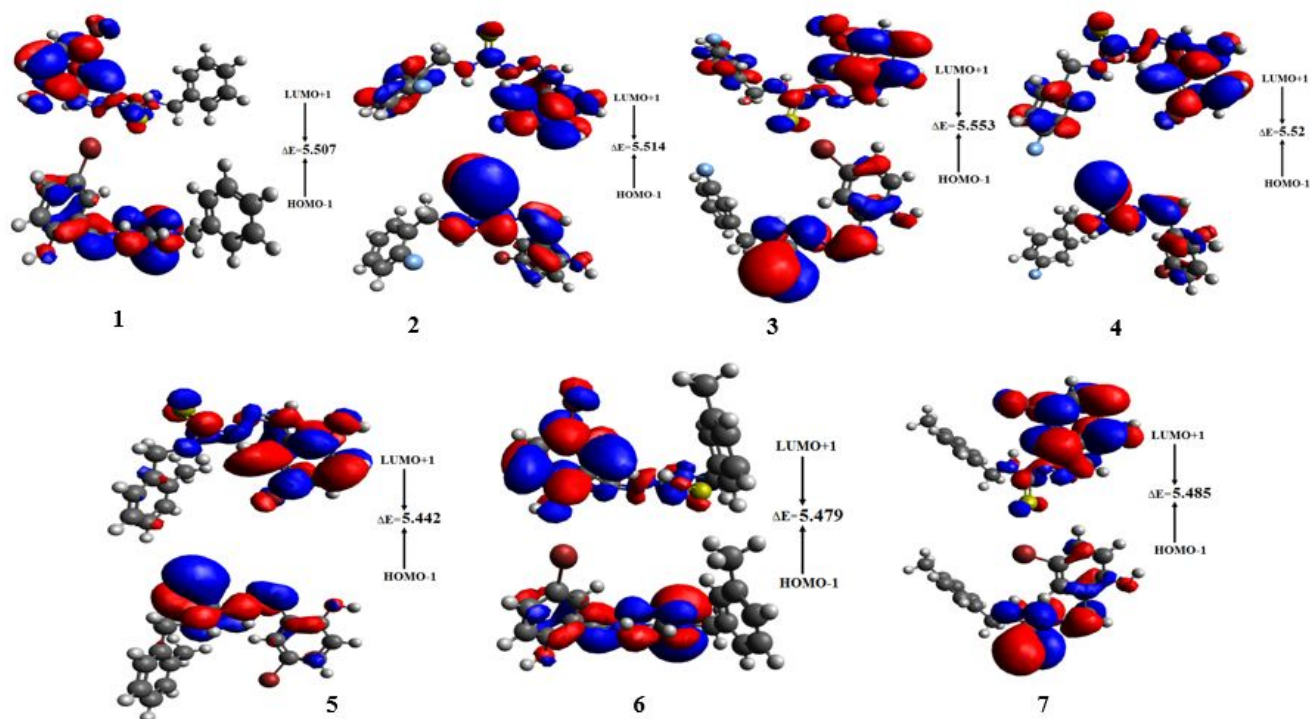

**Figure S1:** Frontier molecular orbitals (HOMO-1/LUMO+1) of (1-7).

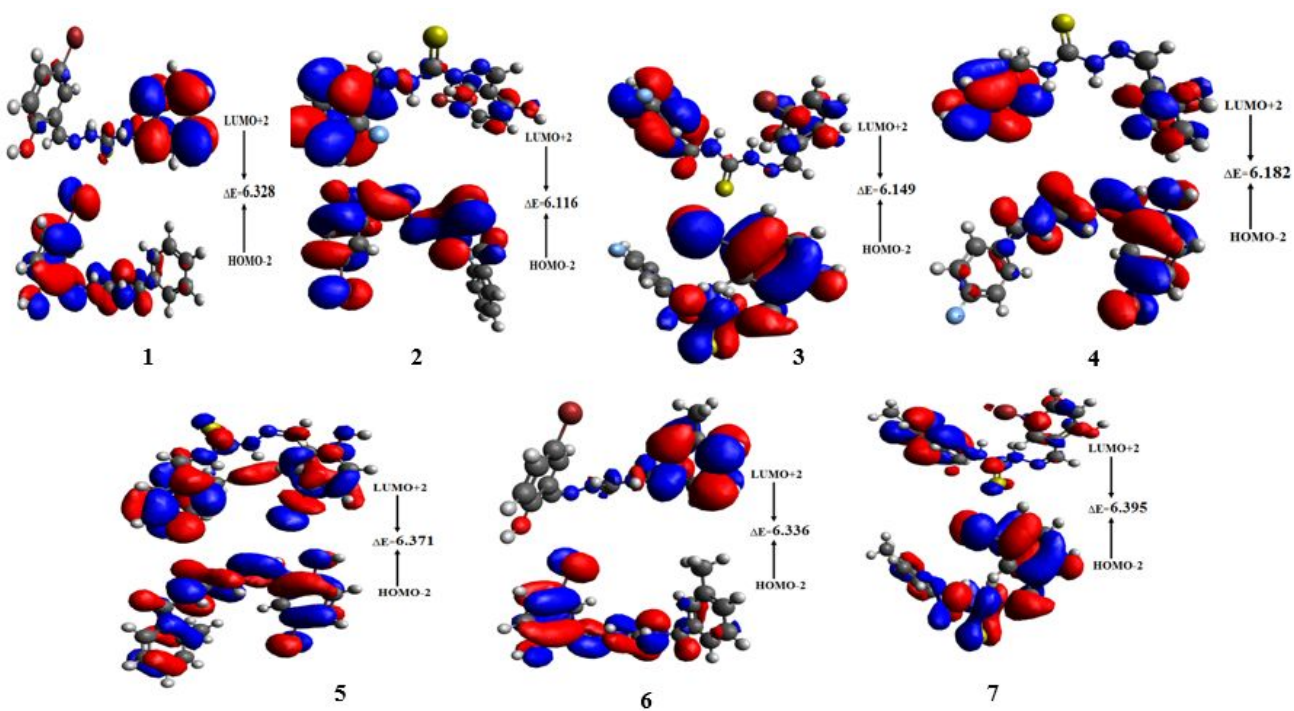

**Figure S2:** Frontier molecular orbitals (HOMO-2/LUMI+2) of (1-7).

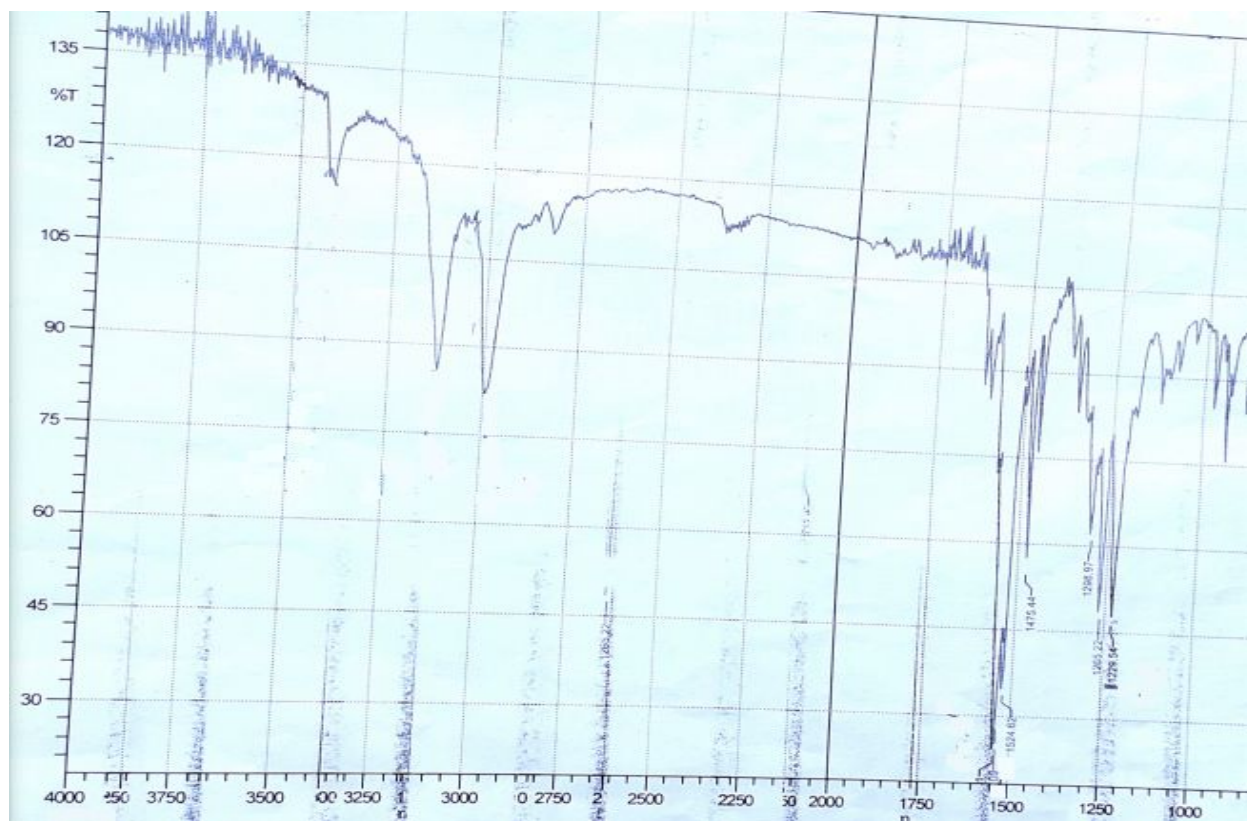

**Figure S3:** Experimental vibrational frequencies for compound (1).

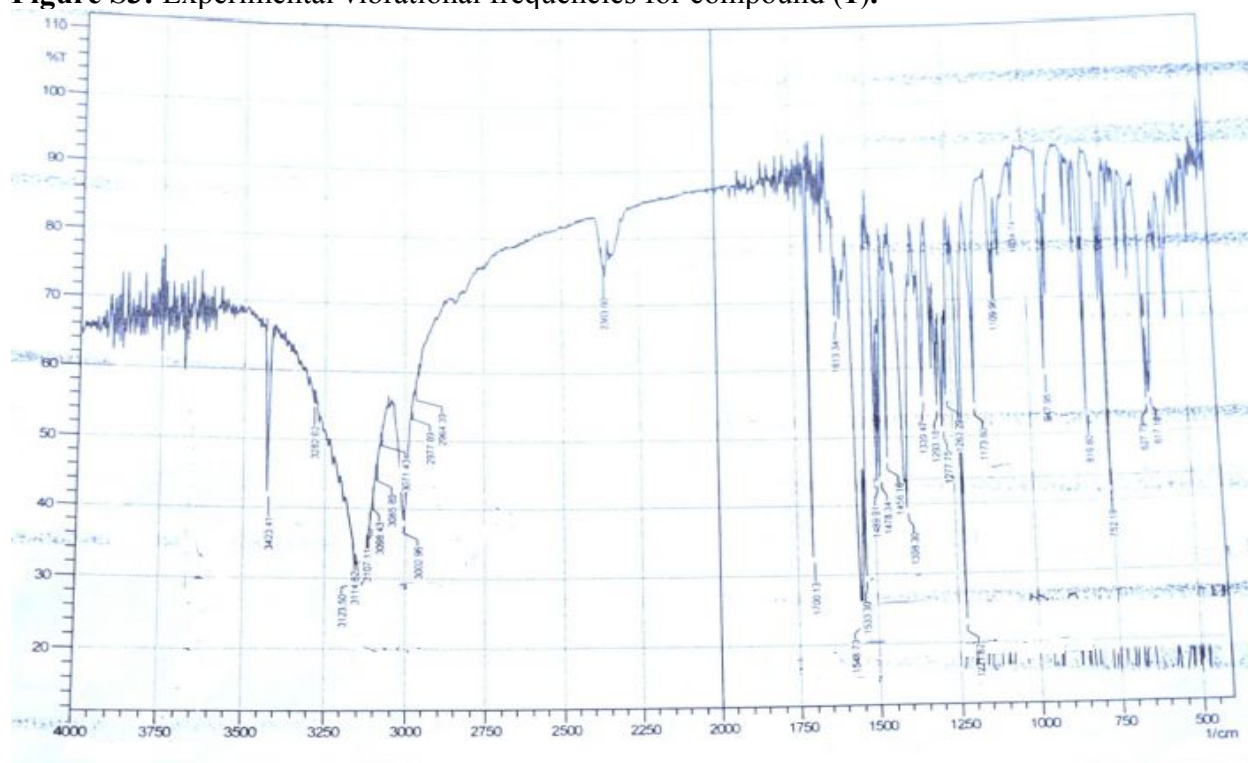

**Figure S4:** Experimental vibrational frequencies for compound (2).

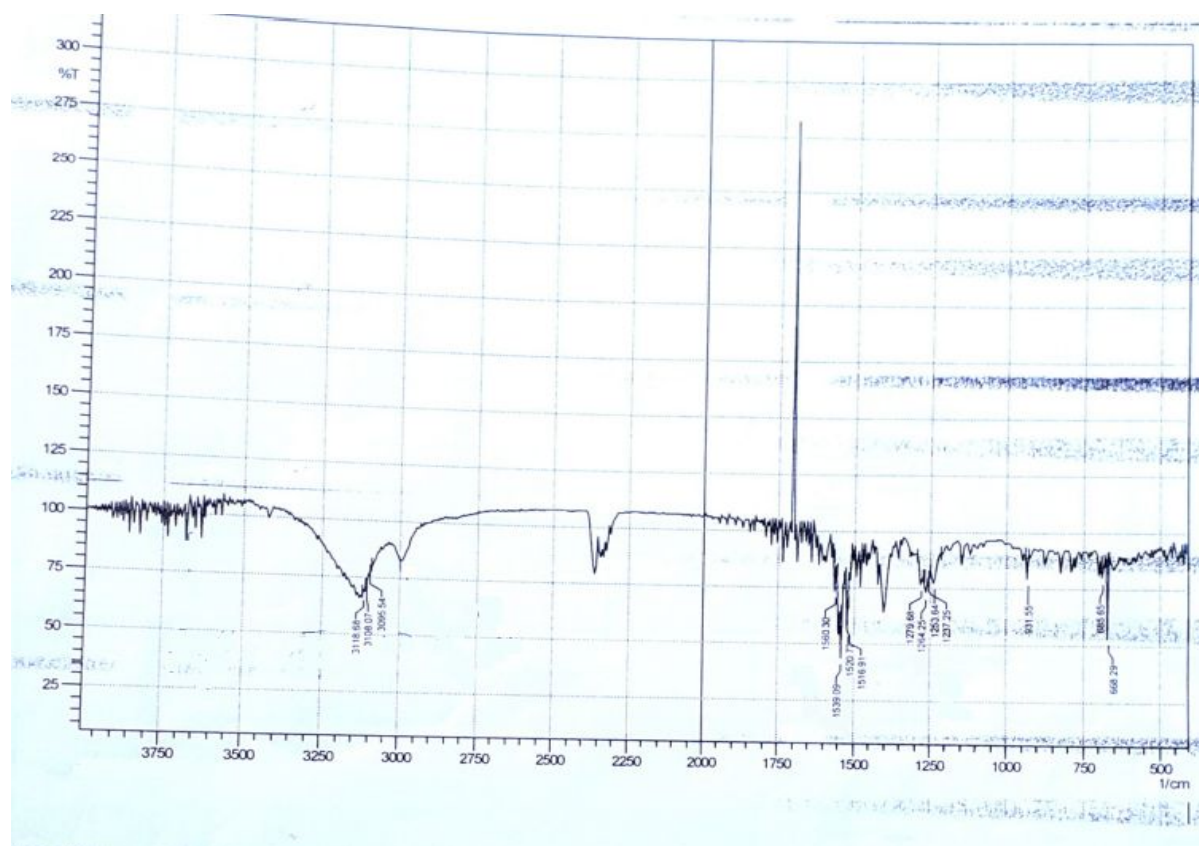



**Figure S5:** Experimental vibrational frequencies for compound (3).

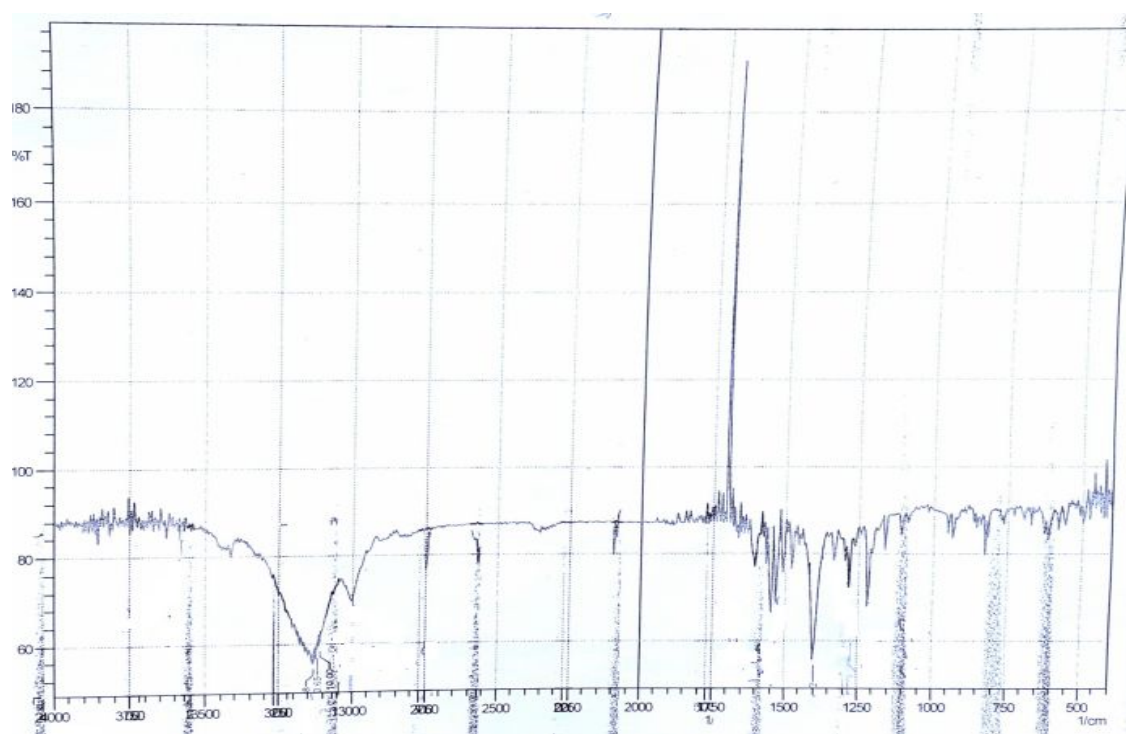

**Figure S6:** Experimental vibrational frequencies for compound (4).

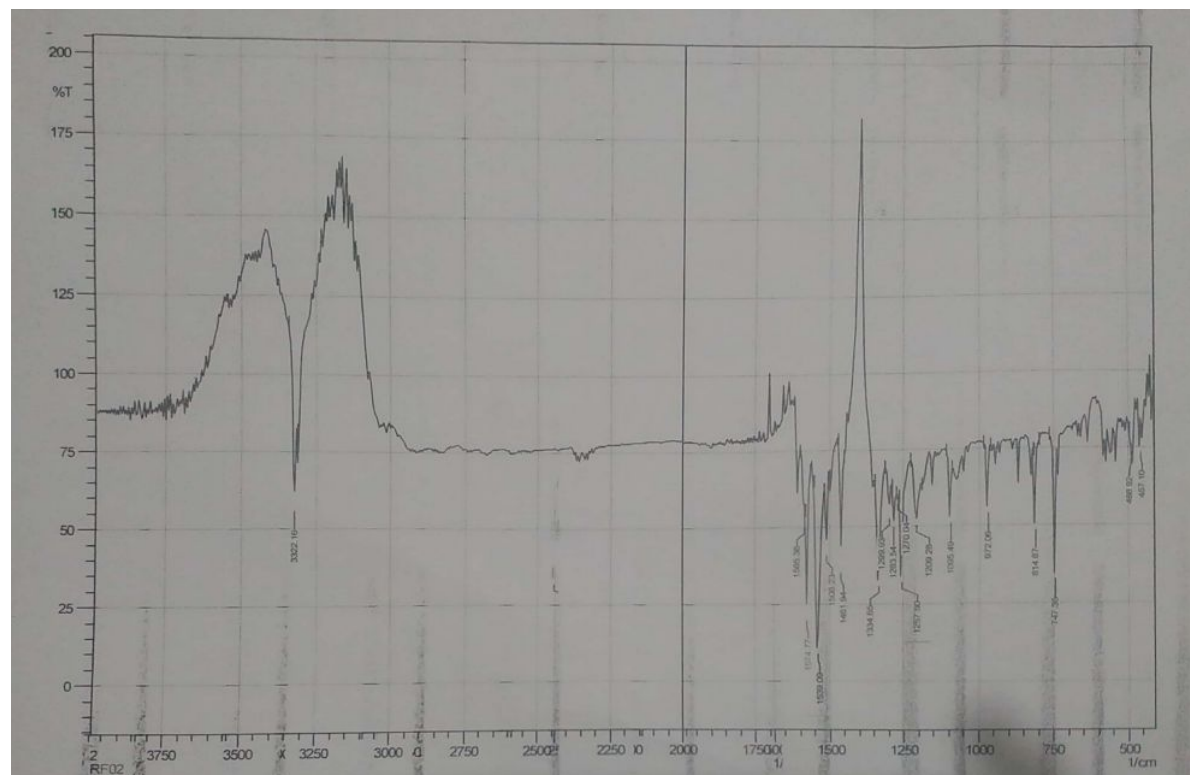

**Figure S7:** Experimental vibrational frequencies for compound (5).

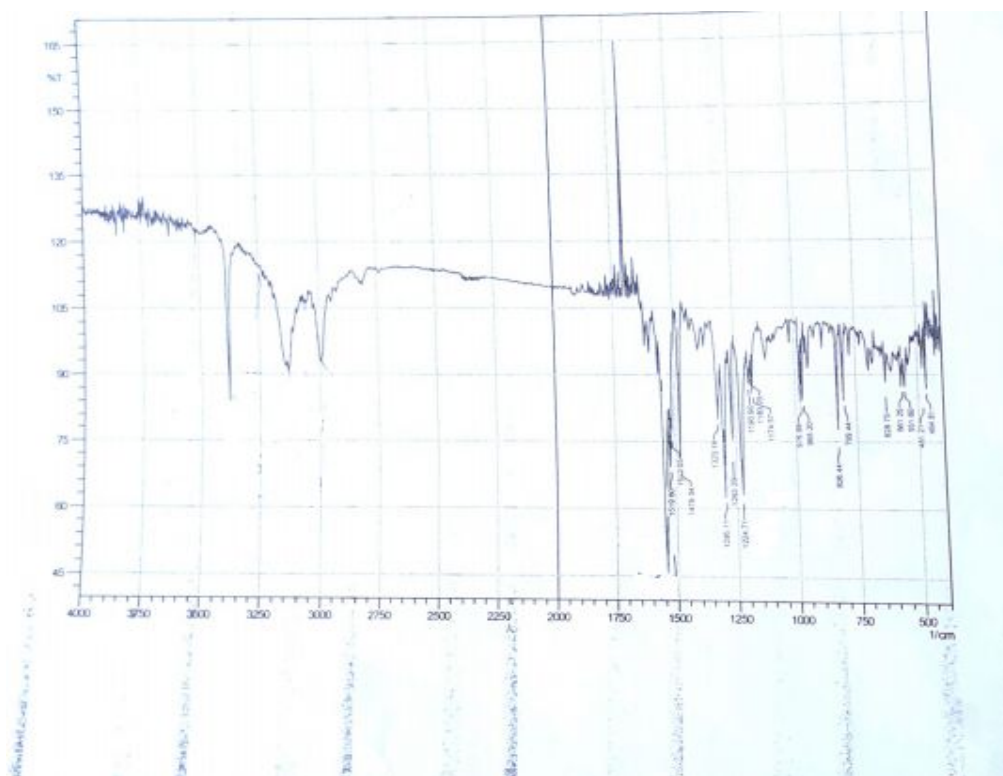

**Figure S8:** Experimental vibrational frequencies for compound (6).

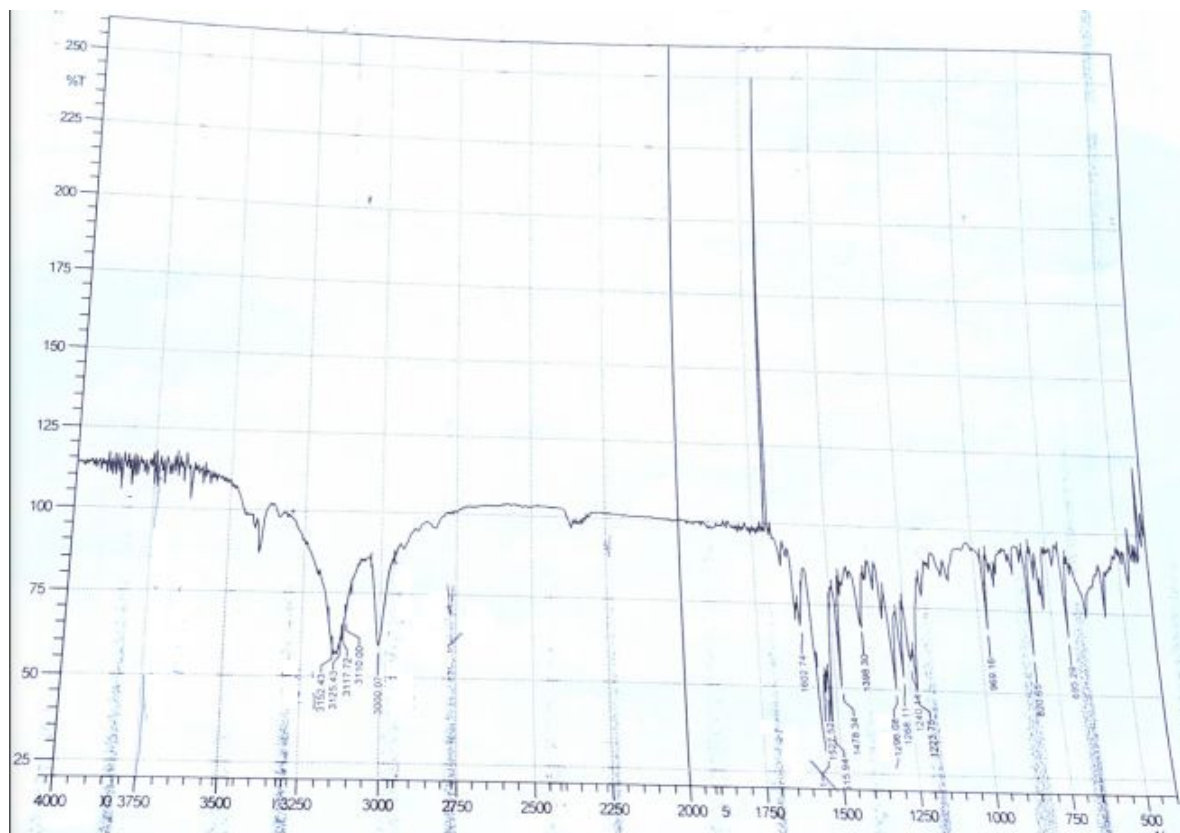

**Figure S9:** Experimental vibrational frequencies for compound (7).

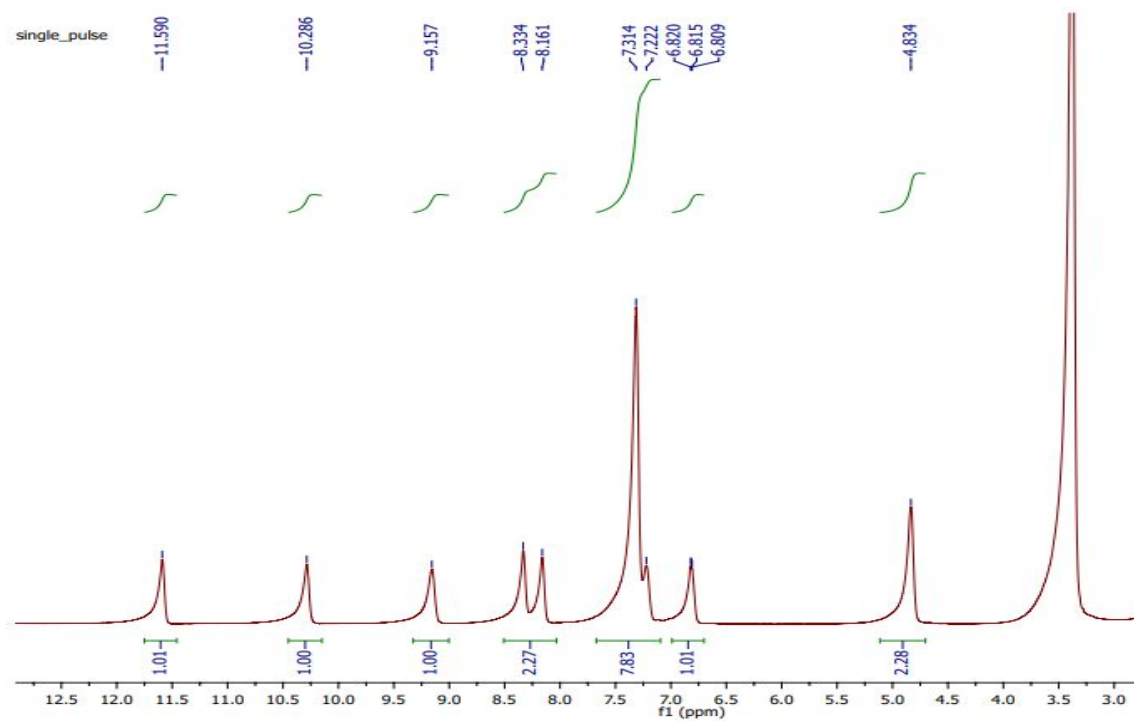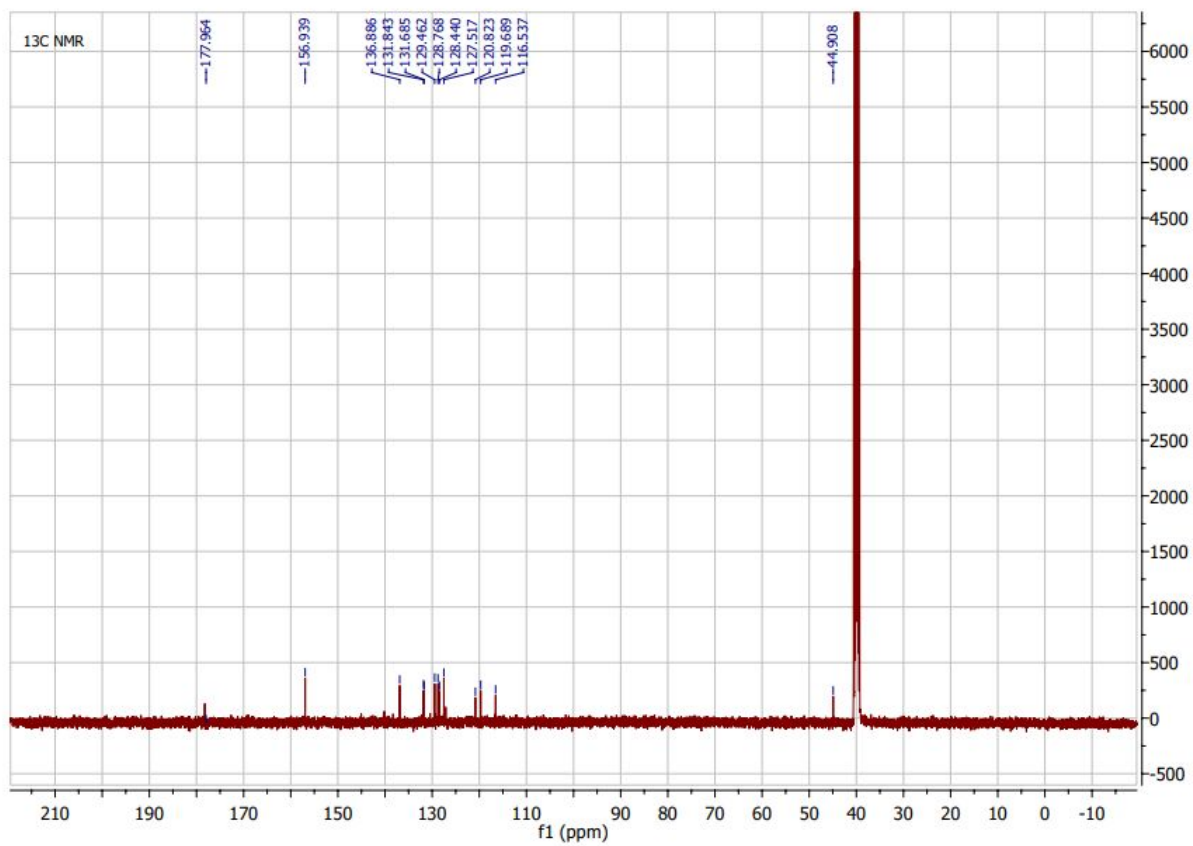

Figure S10: <sup>1</sup>H and <sup>13</sup>C NMR data of the compound (1).



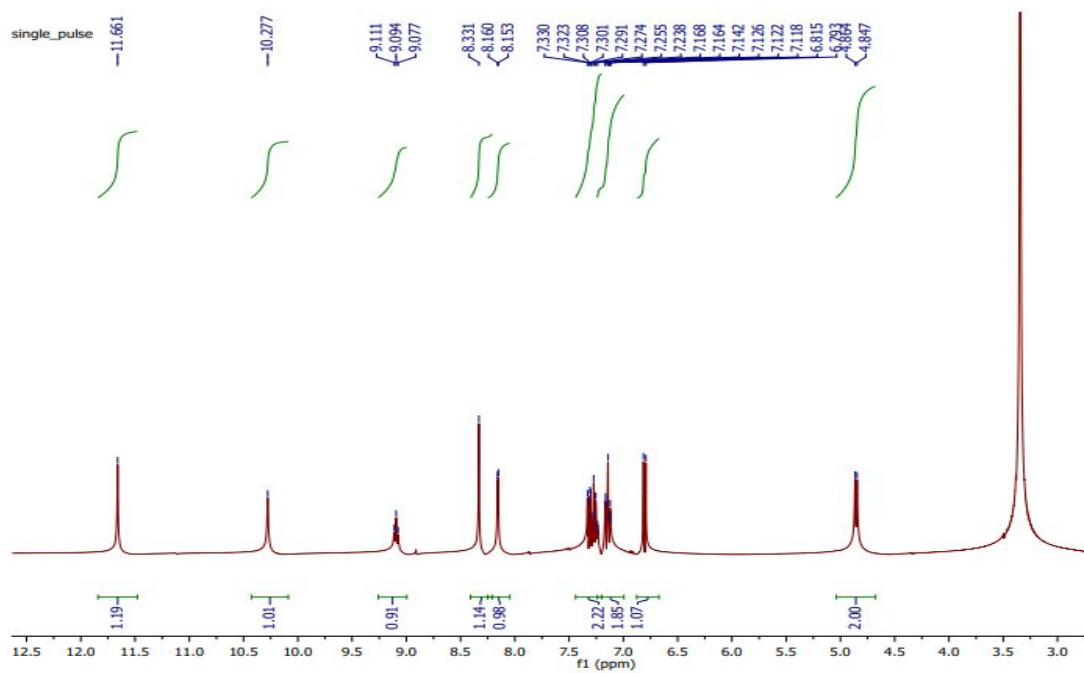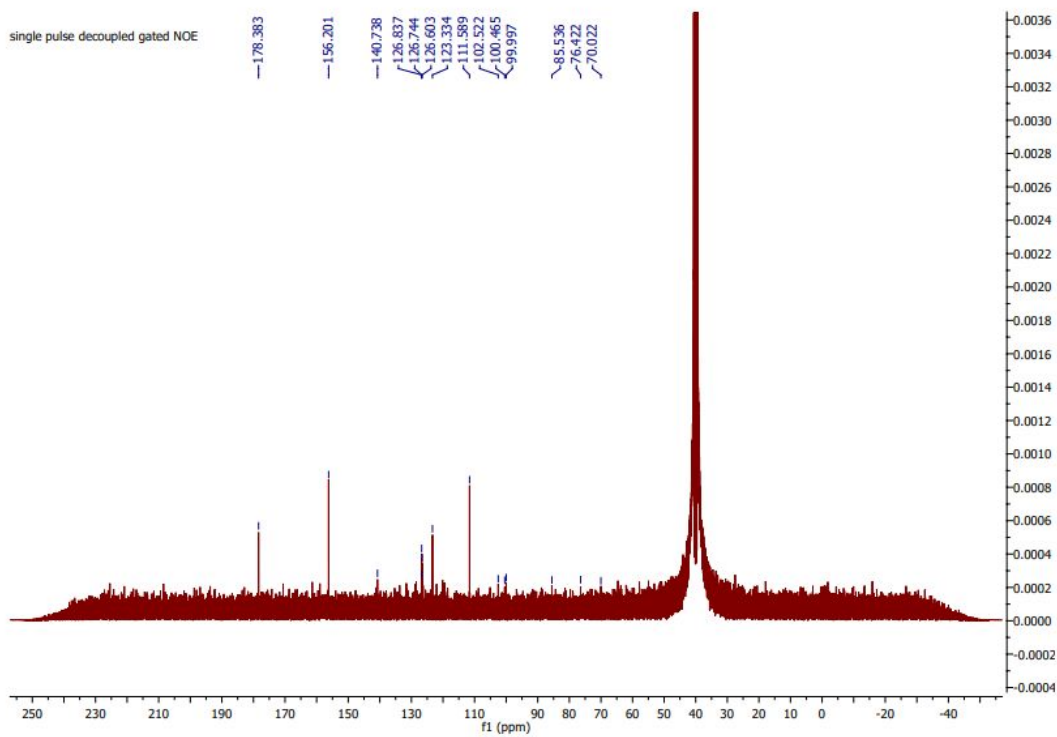

Figure S11:  $^1\text{H}$  and  $^{13}\text{C}$  NMR data of the compound (2).

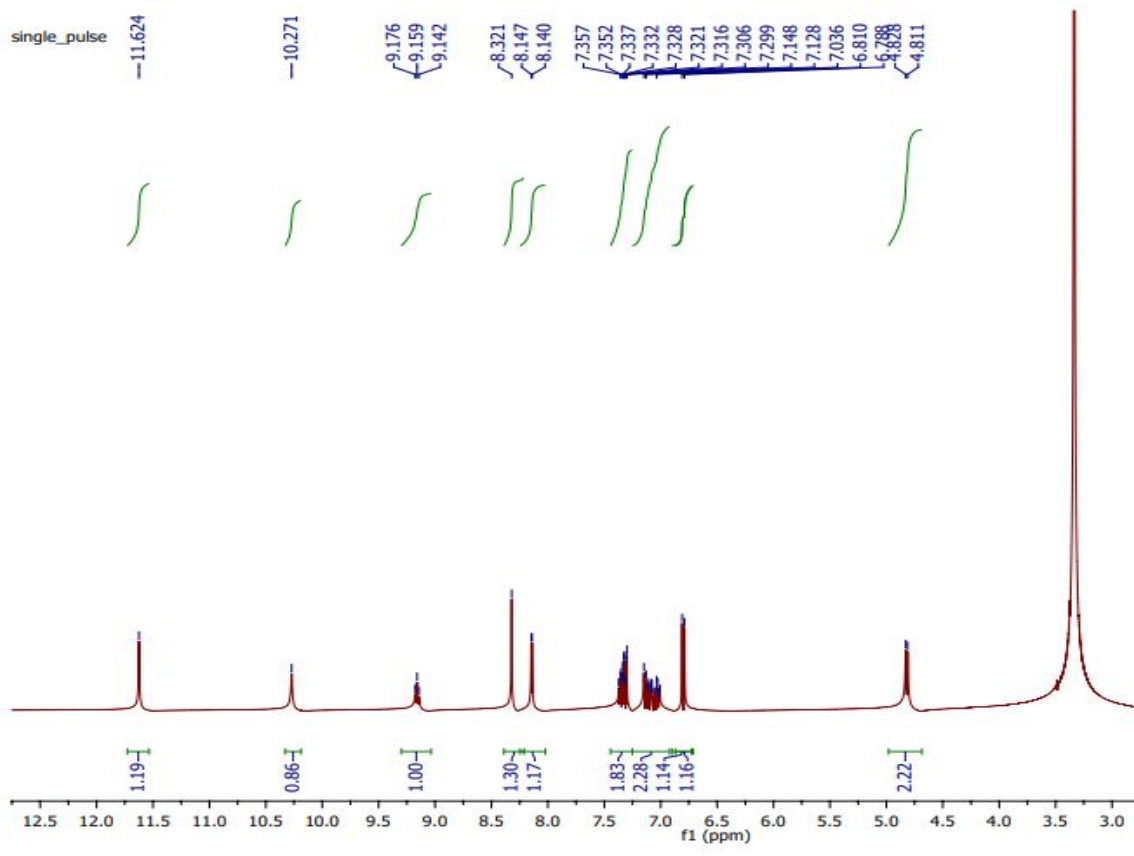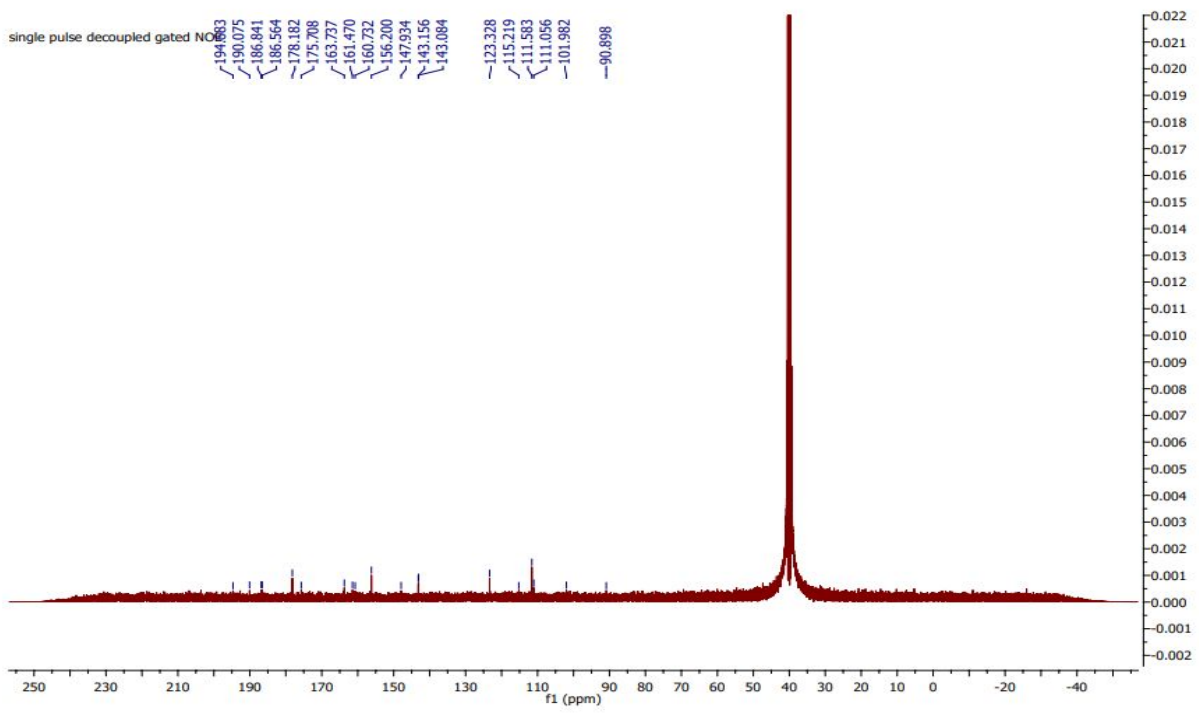

Figure S12: <sup>1</sup>H and <sup>13</sup>C NMR data of the compound (3).

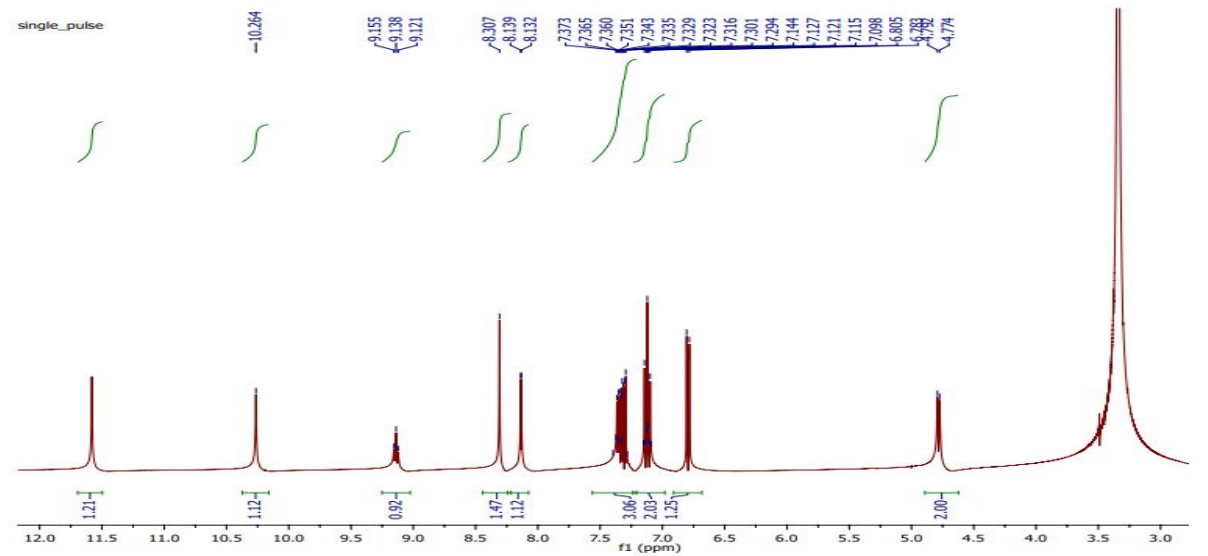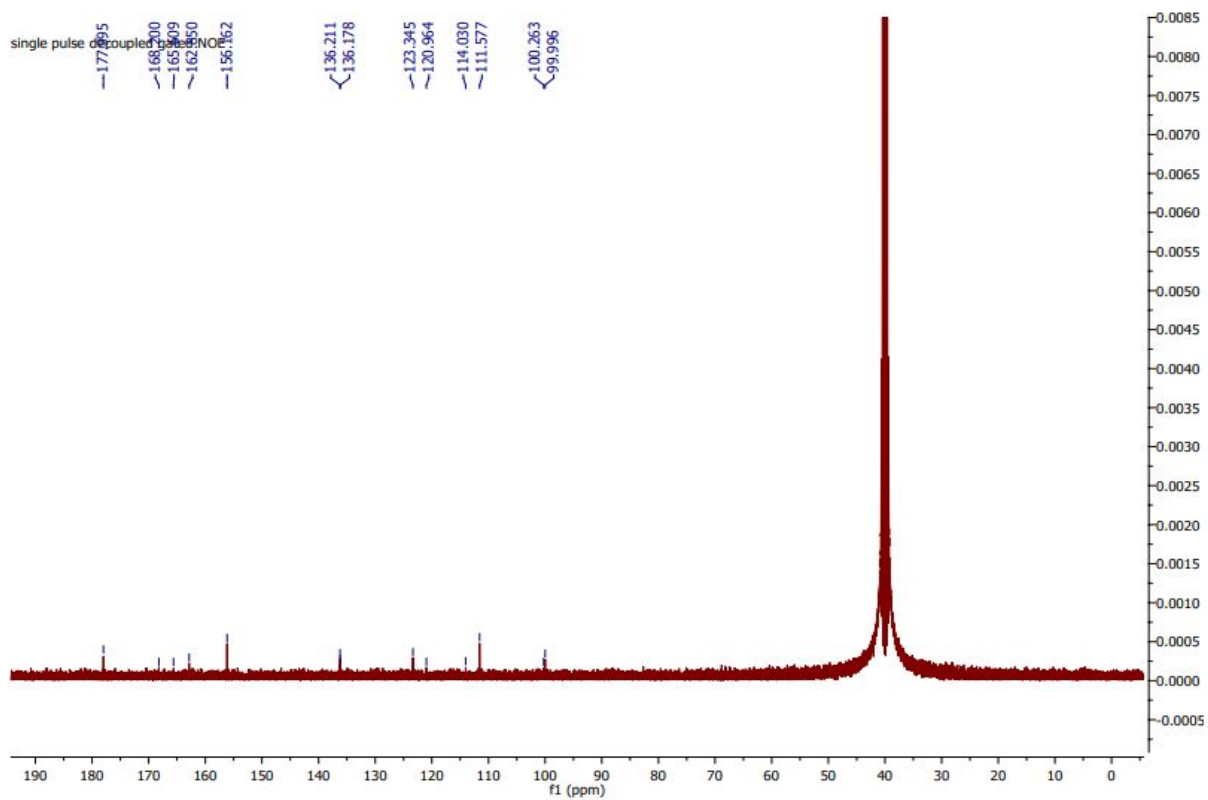

Figure S13:  $^1\text{H}$  and  $^{13}\text{C}$  NMR data of the compound (4).

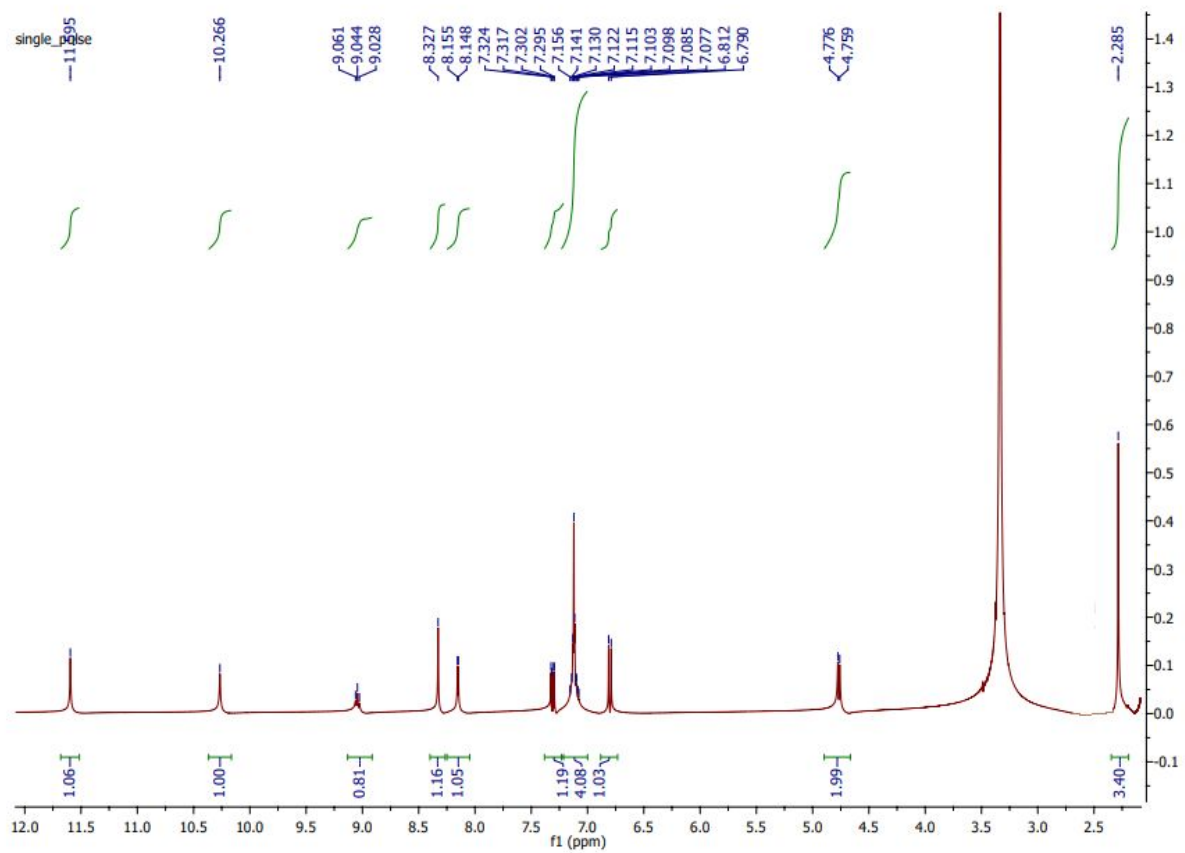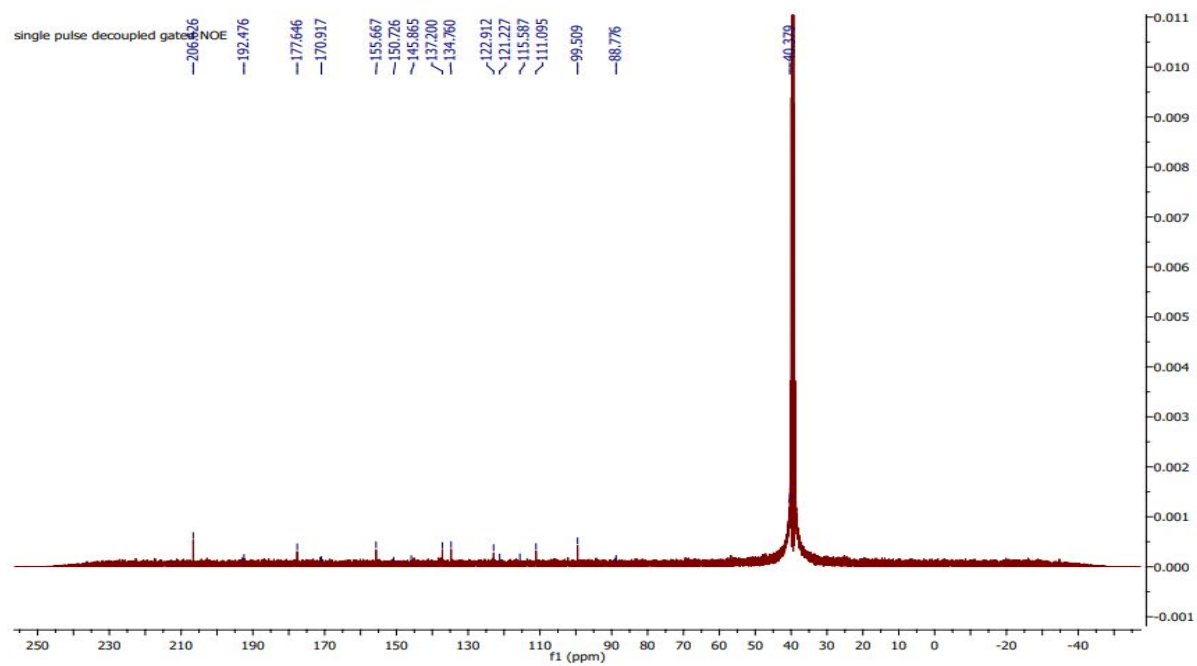

Figure S14: <sup>1</sup>H and <sup>13</sup>C NMR data of the compound (5).

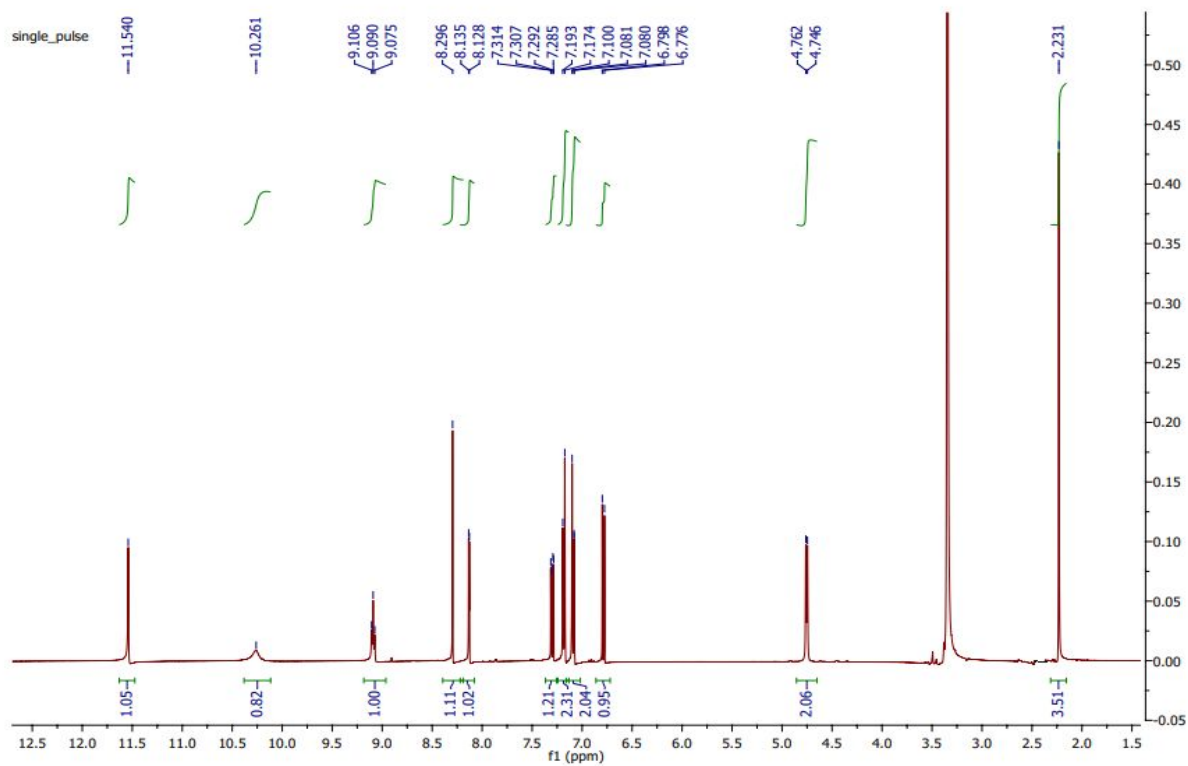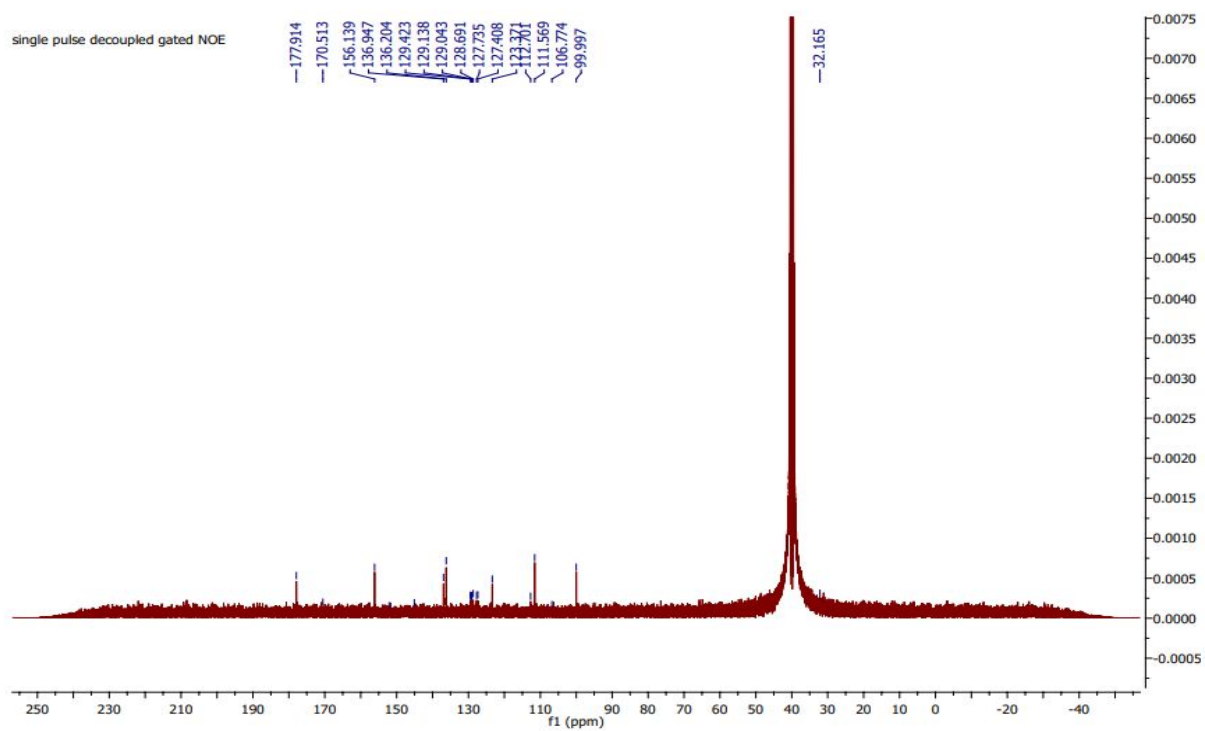

Figure S15:  $^1\text{H}$  and  $^{13}\text{C}$  NMR data of the compound (6).

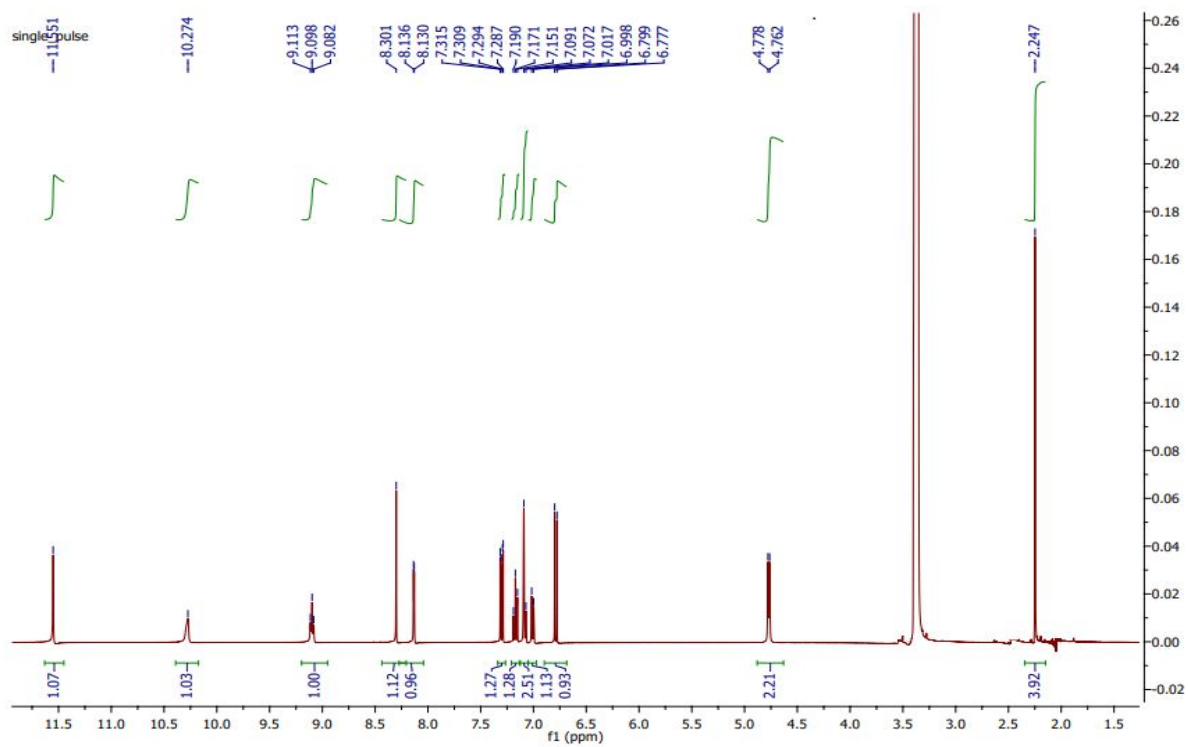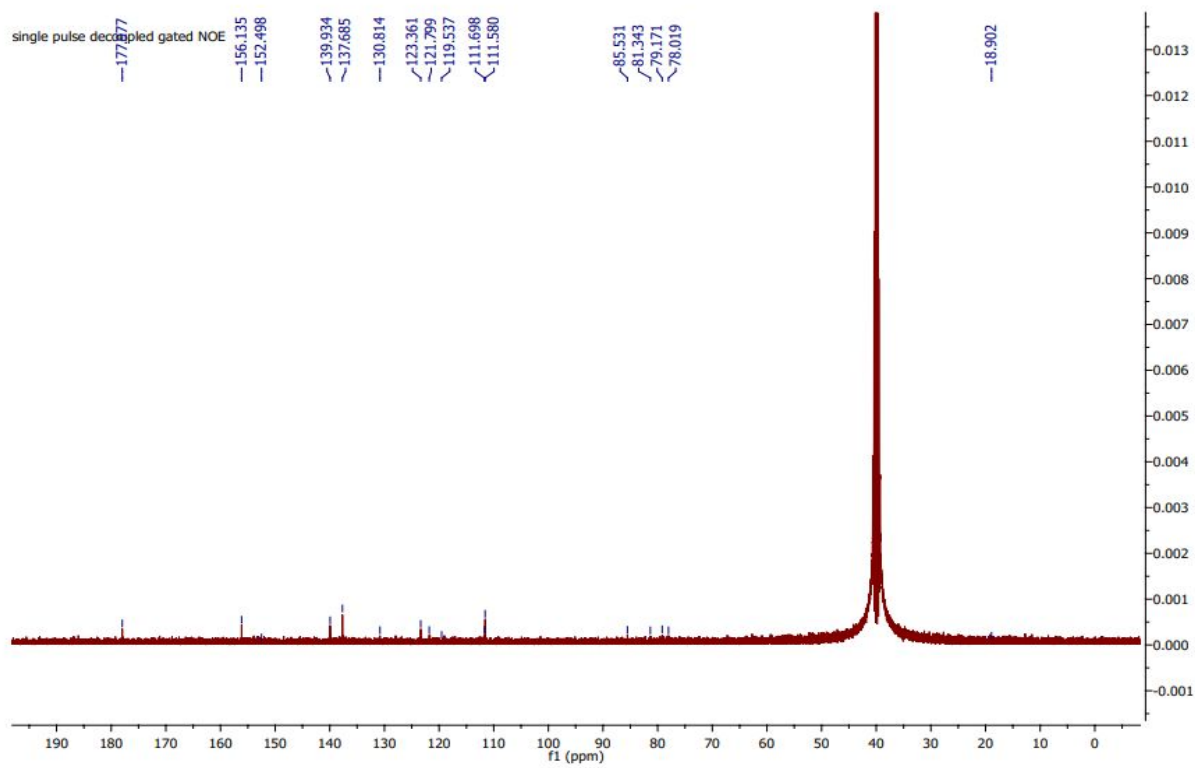

Figure S16:  $^1\text{H}$  and  $^{13}\text{C}$  NMR data of the compound (7).
